# Supplementary material
Source: publisher figshare collection journal article supplement (https://geolsoc.figshare.com/ndownloader/files/35155676)
Supplement: Supplementary file 1 [file 35155676]

## Sheet: Supplementary Material 2
U-Pb age constraints on the source, cooling and exhumation of a Variscan middle crust migmatite complex from the Central Iberian Zone: insights into the Variscan metamorphic evolution and Ediacaran paleogeographic implications
Precambrian Research
Joana Alexandra Ferreira1,2*; Inês Pereira3,4; Telmo Bento dos Santos1,2; João Mata1,2
1IDL - Instituto Dom Luiz, Faculdade de Ciências, Universidade de Lisboa, Campo Grande, 1749-016 Lisboa, Portugal
2 Departamento de Geologia, Faculdade de Ciências, Universidade de Lisboa, C6, Campo Grande, 1749-016 Lisboa, Portugal
3Université Clermont Auvergne, CNRS, IRD, OPGC, Laboratoire Magmas et Volcans, F-63000 Clermont-Ferrand, France
4School of Earth and Environmental Sciences, University of Portsmouth, Building Burnaby Rd Portsmouth P01 3QL, UK
*Correspondence (jaferreira@fc.ul.pt)
Supplementary Material 3. Instrumental setup and ablation parameters; U-Pb ages and ratios of the zircon and apatite standards; and zircon trace elements concentrations of standards
(1) analytical session of the zircon from FCR-LAC migmatites
(2) analytical session of the detrital zircon from the DBSG

## Sheet: Instrumental setup
Laser ablation system		U-Pb			Traces
		Zircon		Apatite	Zircon
Laser system		ASI RESOlution ArF excimer
Ablation cell		S155 Laurin Technic
Laser wavelength (nm)		193
Pulse width (ns)		2020-07-05
Laser beam diameter (µm)		2025-11-01	20 - 50		35 – 25
Fluence (measured) (J/cm2)		2.1 – 2.5	2.8 - 3		3.8 – 4.1
Energy distribution		Flat, homogenised
Repetition rate (Hz)		2	3		4
Carrier gas (l/min)		a mix of He (0.3) and pure N (0.003)
ICP Parameters
ICPMS		ANALYTIK JENA Plasma Quant Elite
RF Power (KW)		1.3
	Gas flow (l/min)
Plasma Flow		10
Auxiliary Flow		1.65
Nebulizer Flow		0.88-0.89
Sampling Depth (mm)		7 to 8
	Acquisition parameters
Scanning mode		Peak hoping
Acquisition mode		Time resolved
Analysis time		1 pulse cleaning, 10 s delay, 20 s blank, 30 s ablation, 5 s wash-out
	Dwell times (ms)
202Hg, 204Hg+Pb, 208Pb, 232Th, 235U, 238U		10
206Pb		20
207Pb		30
Traces*					10
Oxides (232Th16O/232Th)		0.1			0.1-0.2
Fractionation (238U/232Th)		97-100			98
204Hg+Pb Bkg (cps)		400-550
Tuning NIST612 (238U kcps)		920-1000			400 (balanced)
	* see text for all the analysed isotopes

## Sheet: Plešovice (1)
Zircon primary standard				Common-lead uncorrected ratios					Final Ages (Ma)
Id	U (ppm)	Th (ppm)	Th/U	207Pb/235U	±2σ	206Pb/238U	±2σ	Rho	207Pb/235U	±2σ	206Pb/238U	±2σ	207Pb/206Pb	±2σ	Concordance (%)
Z_Plesovice_1	776	83.9	0.108119	0.3997	0.017	0.05357	0.0007	0.15081	340.4	12	336.4	4.3	324	84	98.8249
Z_Plesovice_2	765	81.2	0.106144	0.392	0.017	0.05384	0.00078	0.21745	334.6	13	338	4.7	306	86	101.016
Z_Plesovice_3	763	80.9	0.106029	0.3918	0.017	0.05383	0.00078	0.21816	334.5	13	337.9	4.7	305	86	101.016
Z_Plesovice_4	773	81.5	0.105433	0.386	0.017	0.05373	0.00072	0.30871	331	12	337.3	4.4	278	83	101.903
Z_Plesovice_5	735.3	75.6	0.102815	0.411	0.018	0.05374	0.00078	0.25315	348.7	13	337.4	4.8	334	86	96.7594
Z_Plesovice_6	734.4	75.7	0.103077	0.41	0.018	0.05372	0.00078	0.25331	349.3	13	337.3	4.8	330	88	96.5646
Z_Plesovice_7	784.5	83	0.1058	0.3871	0.017	0.05345	0.00072	0.056497	331.4	12	335.7	4.4	291	85	101.298
Z_Plesovice_8	779	83.43	0.107099	0.3874	0.017	0.05356	0.00072	0.18908	331.3	12	336.3	4.4	313	85	101.509
Z_Plesovice_9	732.3	74.11	0.101202	0.3855	0.017	0.05327	0.00068	0.15494	330.8	12	334.5	4.1	307	85	101.119
Z_Plesovice_10	784.8	83.9	0.106906	0.3958	0.017	0.05429	0.0007	0.20416	338.4	12	340.8	4.3	311	84	100.709
Z_Plesovice_11	722.1	73.76	0.102147	0.381	0.019	0.05329	0.00085	0.15373	327.5	14	334.6	5.2	284	96	102.168
Z_Plesovice_12	797.9	86.4	0.108284	0.3999	0.017	0.0537	0.00074	0.19419	340.6	12	337.2	4.5	344	83	99.0018
Z_Plesovice_13	742.2	75.8	0.102129	0.389	0.017	0.05394	0.00073	0.19095	332.4	13	338.6	4.4	268	87	101.865
Z_Plesovice_14	758.3	78.3	0.103257	0.3992	0.017	0.0538	0.00074	0.30038	340.1	12	337.8	4.5	339	80	99.3237
Z_Plesovice_15	754.6	77.86	0.10318	0.397	0.018	0.05348	0.00067	0.19487	338.4	13	335.8	4.1	302	86	99.2317
Z_Plesovice_1	755.9	78.44	0.10377	0.395	0.011	0.05402	0.00077	0.23438	337.9	7.9	339.1	4.7	302	50	100.355
Z_Plesovice_2	751.6	77.2	0.102714	0.3941	0.011	0.05335	0.00077	0.32606	337.1	8.3	335	4.7	324	52	99.377
Z_Plesovice_3	757.5	79.1	0.104422	0.387	0.011	0.05338	0.00081	0.20108	331.3	8.3	335.2	5	286	56	101.177
Z_Plesovice_4	759	78.3	0.103162	0.4015	0.011	0.05415	0.00081	0.13091	341.9	8.1	339.9	5	341	55	99.415
Z_Plesovice_5	741	76.3	0.102969	0.392	0.013	0.05405	0.00084	0.25984	334.4	9.4	339.3	5.2	283	62	101.465
Z_Plesovice_6	874	96.5	0.110412	0.3976	0.012	0.05354	0.00082	0.22514	339	8.4	336.2	5	339	54	99.174
Z_Plesovice_7	696	69.3	0.099569	0.3863	0.012	0.05329	0.00083	0.17247	330.4	8.8	334.6	5.1	286	61	101.271
Z_Plesovice_8	769	81	0.105332	0.3934	0.012	0.05339	0.00078	0.21016	335.7	8.7	335.3	4.8	315	57	99.8808
Z_Plesovice_9	735.6	69.6	0.0946166	0.396	0.013	0.0537	0.00078	0.23162	338.2	9	337.1	4.8	312	60	99.6747
Z_Plesovice_10	772	87.5	0.113342	0.3921	0.011	0.05404	0.00078	0.20775	335	8.2	339.2	4.7	287	53	101.254
Z_Plesovice_11	777	88.1	0.113385	0.4007	0.011	0.05349	0.00075	0.12029	341.9	8.4	335.9	4.6	362	55	98.2451
Z_Plesovice_12	743	74.5	0.100269	0.392	0.013	0.05394	0.00078	0.29186	334.1	9.3	338.6	4.7	279	60	101.347
Z_Plesovice_13	735.5	75.5	0.102651	0.388	0.012	0.05315	0.00081	0.20297	331.8	8.9	333.8	4.9	301	60	100.603
Z_Plesovice_14	769.2	78.6	0.102184	0.396	0.012	0.05407	0.00086	0.24422	337.6	9	339.4	5.2	309	58	100.533
Z_Plesovice_1	777	82.2	0.105792	0.3934	0.0091	0.05379	0.00076	0.25776	335.9	6.6	337.7	4.7	304	47	100.536
Z_Plesovice_2	747	76.6	0.102544	0.3927	0.0084	0.05358	0.00078	0.20624	335.5	6.1	336.4	4.8	318	44	100.268
Z_Plesovice_3	726.5	74.48	0.102519	0.3928	0.0097	0.05355	0.00077	0.19278	335.3	7.1	336.3	4.7	311	51	100.298
Z_Plesovice_4	778	81.2	0.10437	0.3983	0.008	0.05384	0.00076	0.21882	339.7	5.8	338	4.6	335	42	99.4996
Z_Plesovice_5	781.1	79.46	0.101728	0.3938	0.0089	0.05364	0.00077	0.15954	337	6.3	336.8	4.7	327	47	99.9407
Z_Plesovice_6	759.9	78.24	0.102961	0.3913	0.0089	0.0536	0.00078	0.18432	334.5	6.5	336.6	4.7	313	48	100.628
Z_Plesovice_7	670.9	72	0.107319	0.3949	0.0088	0.05374	0.00076	0.18156	337.7	6.3	337.4	4.7	308	47	99.9112
Z_Plesovice_8	839	83.7	0.0997616	0.3905	0.0085	0.05365	0.00078	0.26356	334	6.2	336.9	4.8	288	44	100.868
Z_Plesovice_9	791.3	81.4	0.102869	0.3994	0.008	0.05369	0.00076	0.246	340.5	5.8	337.1	4.6	343	41	99.0015
Z_Plesovice_10	771	80.1	0.103891	0.3919	0.009	0.05373	0.00077	0.12246	335.5	6.6	337.3	4.7	305	49	100.537
Z_Plesovice_11	668	67.5	0.101048	0.3905	0.01	0.05351	0.00083	0.16299	334.4	7.5	336	5.1	308	55	100.478
Z_Plesovice_12	832	94	0.112981	0.3957	0.0088	0.05378	0.00075	0.24816	338.3	6.5	337.7	4.6	316	46	99.8226
Z_Plesovice_13	700.8	71.3	0.101741	0.3923	0.0098	0.05355	0.00079	0.28839	334.9	7.1	336.2	4.8	305	50	100.388
Z_Plesovice_14	769.8	80	0.103923	0.395	0.0092	0.05395	0.00077	0.20463	337	6.6	338.7	4.7	305	49	100.504
Z_Plesovice_15	788	82.2	0.104315	0.3941	0.0085	0.0535	0.00075	0.20915	336.5	6.2	335.9	4.6	322	45	99.8217
Z_Plesovice_1	755	78	0.103311	0.394	0.0079	0.05359	0.0012	0.21018	336.4	5.8	336.5	7.1	358	74	100.03
Z_Plesovice_2	752	77.3	0.102793	0.3941	0.0082	0.05434	0.0012	0.20211	336.5	6	341	7.4	279	75	101.337
Z_Plesovice_3	754.7	78.31	0.103763	0.3944	0.0083	0.05383	0.0012	0.2063	338	6.3	338	7.2	294	75	100
Z_Plesovice_4	756.9	77.8	0.102788	0.3961	0.0087	0.05333	0.0012	0.21788	337.9	6.3	334.9	7.2	314	77	99.1122
Z_Plesovice_5	752	77.91	0.103604	0.3889	0.0085	0.05339	0.0012	0.28809	332.6	6.2	335.2	7.4	273	76	100.782
Z_Plesovice_6	756	77.99	0.103161	0.3969	0.0081	0.05329	0.0012	0.31568	338.5	5.9	335	7.5	353	74	98.966
Z_Plesovice_7	755.1	78.13	0.10347	0.3938	0.0077	0.0539	0.0012	0.24321	336.4	5.6	338.4	7.3	317	74	100.595
Z_Plesovice_8	754.6	77.85	0.103167	0.3929	0.0088	0.05361	0.0012	0.26028	335.5	6.4	337	7.3	309	75	100.447
Z_Plesovice_9	755.7	78.1	0.103348	0.3946	0.0079	0.05323	0.0012	0.3033	337.5	5.6	334.3	7.3	350	72	99.0519
Z_Plesovice_10	755.4	78.13	0.103429	0.3946	0.0081	0.05411	0.0012	0.31828	337.5	6	339.7	7.2	302	74	100.652
Z_Plesovice_11	753.1	77.7	0.103174	0.393	0.0073	0.05369	0.0012	0.43581	336.4	5.4	337.1	7.4	307	70	100.208
Z_Plesovice_12	761	79.2	0.104074	0.3939	0.0077	0.05408	0.0012	0.31632	336.5	5.6	339.9	7.4	311	74	101.01
Z_Plesovice_13	751.7	77.35	0.1029	0.3944	0.0085	0.05384	0.0012	0.25232	336.6	6.2	338	7.4	337	76	100.416
Z_Plesovice_14	752.7	77.5	0.102963	0.395	0.0078	0.05274	0.0012	0.28428	337.2	5.7	331.3	7.2	386	75	98.2503
Z_Plesovice_15	778.2	84.4	0.108455	0.3934	0.0075	0.05415	0.0012	0.24091	336.1	5.4	339.9	7.2	291	74	101.131
Z_Plesovice_16	743.2	75.15	0.101117	0.3939	0.0096	0.05347	0.0012	0.3534	336.1	7	335.7	7.4	297	78	99.881
Z_Plesovice_1	886	91.1	0.102822	0.414	0.042	0.05398	0.0013	0.043161	349	31	338.8	7.8	343	190	97.0774
Z_Plesovice_2	771.9	81.2	0.105195	0.398	0.042	0.05397	0.0013	0.13645	336	31	338.7	8.1	242	190	100.804
Z_Plesovice_3	689	68.9	0.1	0.394	0.042	0.0538	0.0013	0.093026	334	31	337.7	7.9	220	190	101.108
Z_Plesovice_4	747	76.5	0.10241	0.39	0.042	0.05315	0.0013	0.1167	330	31	333.7	7.8	230	190	101.121
Z_Plesovice_5	729	74.7	0.102469	0.382	0.041	0.0536	0.0013	0.12552	324	30	336.5	8.2	190	190	103.858
Z_Plesovice_6	813	84	0.103321	0.388	0.041	0.05348	0.0013	0.21209	330	30	335.7	8.1	250	190	101.727
Z_Plesovice_7	758	78.8	0.103958	0.384	0.042	0.05401	0.0014	0.22419	328	32	338.9	8.3	220	190	103.323
Z_Plesovice_8	732	75.7	0.103415	0.367	0.04	0.05315	0.0013	0.0081	314	30	333.7	8.2	170	190	106.274
Z_Plesovice_9	795	85.2	0.10717	0.403	0.044	0.05356	0.0014	0.036041	342	32	336.2	8.3	330	190	98.3041
Z_Plesovice_10	783	81.6	0.104215	0.402	0.042	0.05388	0.0013	0.053736	339	30	338.2	7.9	311	190	99.764
Z_Plesovice_11	671	70.3	0.104769	0.378	0.041	0.05343	0.0014	0.088415	324	31	336.1	8.7	200	190	103.735
Z_Plesovice_12	843	97.9	0.116133	0.42	0.044	0.05429	0.0014	0.12117	352	32	340.7	8.4	385	190	96.7898
Z_Plesovice_13	897	95.6	0.106577	0.403	0.042	0.05362	0.0013	0.16136	342	31	336.6	7.8	325	190	98.4211
Z_Plesovice_14	657	65.6	0.0998478	0.368	0.041	0.05391	0.0014	0.090759	314	30	338.4	8.3	90	190	107.771
Z_Plesovice_15	792	81.5	0.102904	0.397	0.041	0.05368	0.0014	0.28925	337	30	337	8.3	284	190	100
Z_Plesovice_16	805	81.9	0.101739	0.375	0.04	0.05399	0.0013	0.23056	318	30	338.9	8.1	143	190	106.572
Z_Plesovice_17	800	80.6	0.10075	0.39	0.04	0.05278	0.0012	0.044359	331	30	331.5	7.6	262	190	100.151
Z_Plesovice_18	755	77.5	0.102649	0.389	0.041	0.05386	0.0013	0.0073025	331	29	338.1	8.1	210	190	102.145
Z_Plesovice_19	758	76.8	0.101319	0.377	0.04	0.05302	0.0013	0.0078196	322	30	332.9	7.8	193	190	103.385
Z_Plesovice_20	752	80.3	0.106782	0.448	0.047	0.05497	0.0013	0.2089	372	32	344.9	8.1	464	190	92.7151
Z_Plesovice_21	732.8	75.4	0.102893	0.396	0.042	0.0535	0.0013	0.10642	335	30	335.8	7.8	260	190	100.239
Z_Plesovice_1	762	80.1	0.105118	0.391	0.017	0.05377	0.0017	0.060321	332	13	337.5	10	205	93	101.657
Z_Plesovice_2	755	78.8	0.104371	0.403	0.017	0.05349	0.0017	0.070584	340	12	335.8	10	300	90	98.7647
Z_Plesovice_3	728	74.9	0.102885	0.395	0.018	0.05391	0.0017	0.011056	334	13	338.3	10	238	95	101.287
Z_Plesovice_4	752	77.1	0.102527	0.393	0.019	0.0536	0.0016	0.14976	332	14	336.5	10	270	99	101.355
Z_Plesovice_5	710	71.4	0.100563	0.393	0.019	0.05356	0.0017	0.11014	332	14	336.2	10	310	100	101.265
Z_Plesovice_6	779	79.5	0.102054	0.385	0.017	0.05374	0.0016	0.046916	328	13	337.3	9.9	234	98	102.835
Z_Plesovice_7	764	78.7	0.10301	0.394	0.018	0.05369	0.0017	0.25233	335	13	337.1	10	268	95	100.627
Z_Plesovice_8	771	79.6	0.103243	0.392	0.017	0.05327	0.0016	0.14482	332	12	334.5	9.9	242	88	100.753
Z_Plesovice_9	733	76.4	0.104229	0.395	0.017	0.05443	0.0017	0.21202	336	12	341.5	10	238	89	101.637
Z_Plesovice_10	795	84.3	0.106038	0.396	0.016	0.05351	0.0017	0.11663	337	12	336.6	10	326	87	99.8813
Z_Plesovice_11	732	73.6	0.100546	0.386	0.018	0.05334	0.0017	0.102	328	13	334.9	10	254	96	102.104
Z_Plesovice_12	739	77.4	0.104736	0.405	0.018	0.05398	0.0016	0.10274	341	13	338.8	10	289	98	99.3548
Z_Plesovice_13	731	76	0.103967	0.387	0.018	0.05353	0.0016	0.17819	328	13	336.1	9.9	218	94	102.47
Z_Plesovice_14	760	79.3	0.104342	0.392	0.017	0.05384	0.0016	0.15981	332	13	338	10	236	91	101.807
Z_Plesovice_15	754	78	0.103448	0.404	0.019	0.05341	0.0016	0.08461	340	14	335.3	10	311	98	98.6176
Z_Plesovice_16	770	80.4	0.104416	0.394	0.016	0.05383	0.0017	0.10096	337	12	337.9	10	294	91	100.267
Z_Plesovice_1	718	74	0.103064	0.4173	0.018	0.05385	0.0011	0.2511	353.3	13	338.1	6.7	443	100	95.6977
Z_Plesovice_2	715	73.3	0.102517	0.3969	0.018	0.0542	0.0011	0.31235	339.1	13	340.2	6.8	319	100	100.324
Z_Plesovice_3	753	78	0.103586	0.3839	0.018	0.05316	0.0011	0.22302	328.8	13	333.9	6.5	275	100	101.551
Z_Plesovice_4	776.5	81.4	0.104829	0.3828	0.017	0.0535	0.0011	0.25739	328.3	13	335.9	6.7	260	100	102.315
Z_Plesovice_5	773.3	80.83	0.104526	0.3863	0.017	0.05396	0.0011	0.24191	330.7	13	338.7	6.8	250	100	102.419
Z_Plesovice_6	742.4	76.1	0.102505	0.3885	0.017	0.05358	0.0011	0.27681	333	13	336.5	6.7	293	100	101.051
Z_Plesovice_7	778	81.3	0.104499	0.3964	0.018	0.0537	0.0011	0.24121	338.7	13	337.2	6.6	327	100	99.5571
Z_Plesovice_8	737.2	74.88	0.101574	0.3921	0.018	0.05349	0.0011	0.17405	336.3	13	335.9	6.8	316	100	99.8811
Z_Plesovice_9	777	80.9	0.104118	0.4008	0.018	0.05423	0.0011	0.087462	341.3	13	340.4	6.7	323	100	99.7363
Z_Plesovice_10	739	74.8	0.101218	0.3868	0.017	0.05289	0.0011	0.21146	331.2	13	332.2	6.7	303	100	100.302
Z_Plesovice_11	737.8	75.4	0.102196	0.3916	0.018	0.05356	0.0011	0.23414	335.3	13	336.3	6.7	295	98	100.298
Z_Plesovice_12	746	75.6	0.10134	0.397	0.018	0.05427	0.0011	0.18971	339.9	13	340.6	6.9	295	100	100.206
Z_Plesovice_13	765	78.9	0.103137	0.4055	0.019	0.05338	0.0011	0.27909	344.6	13	335.2	7	376	100	97.2722
Z_Plesovice_14	766.5	77.73	0.101409	0.3953	0.018	0.05399	0.0011	0.28076	337.3	13	338.9	6.8	297	100	100.474
Z_Plesovice_15	736.8	74.26	0.100787	0.3895	0.017	0.05364	0.0011	0.12839	333.9	13	336.8	6.9	305	100	100.869
Z_Plesovice_16	784.8	92.76	0.118196	0.4126	0.019	0.05311	0.0011	0.19167	349.8	13	333.6	6.7	460	100	95.3688
Z_Plesovice_17	768.1	78.26	0.101888	0.3867	0.018	0.05376	0.0011	0.24943	331	13	337.5	6.7	280	100	101.964
Z_Plesovice_18	734.1	73.1	0.0995777	0.3938	0.018	0.05419	0.0011	0.14847	336.2	13	340.2	6.8	291	100	101.19
Z_Plesovice_19	780.1	79.29	0.101641	0.3855	0.018	0.05339	0.0011	0.21577	330.1	13	335.3	6.7	283	100	101.575
Z_Plesovice_20	748.6	75.93	0.101429	0.3905	0.018	0.05376	0.0011	0.19189	333.9	13	337.5	6.8	294	100	101.078
Z_Plesovice_21	758	78.2	0.103166	0.3934	0.017	0.05381	0.0011	0.13603	336	13	337.9	6.7	302	100	100.565
Z_Plesovice_22	746.2	76.07	0.101943	0.3995	0.018	0.05353	0.0011	0.17841	340.3	13	336.1	6.8	345	100	98.7658
Z_Plesovice_1	778.7	81.2	0.104276	0.3943	0.014	0.05422	0.00087	0.26128	336.7	10	340.3	5.3	301	70	101.069
Z_Plesovice_2	733	74.7	0.10191	0.3912	0.014	0.05375	0.0009	0.16906	335	10	337.4	5.5	295	73	100.716
Z_Plesovice_3	745.9	75.84	0.101676	0.3935	0.014	0.05358	0.00088	0.22315	336	10	336.4	5.4	307	71	100.119
Z_Plesovice_4	803	84.7	0.105479	0.392	0.014	0.05337	0.00086	0.31499	335	10	335.1	5.2	319	68	100.03
Z_Plesovice_5	764.7	78.8	0.103047	0.3974	0.014	0.054	0.0009	0.1818	339.6	10	339	5.5	320	70	99.8233
Z_Plesovice_6	737.6	77.06	0.104474	0.4101	0.014	0.05358	0.00088	0.26373	348.2	10	336.4	5.4	413	69	96.6111
Z_Plesovice_7	760.9	78.25	0.102839	0.3876	0.014	0.05325	0.00089	0.21417	331.8	10	334.4	5.4	301	72	100.784
Z_Plesovice_8	736.6	76.5	0.103856	0.3863	0.014	0.05281	0.00087	0.27374	330.8	10	331.7	5.3	306	70	100.272
Z_Plesovice_9	758	78.7	0.103826	0.3867	0.014	0.05389	0.0009	0.16491	331.2	10	338.3	5.5	275	70	102.144
Z_Plesovice_10	724	74.9	0.103453	0.3935	0.014	0.05395	0.0009	0.23425	336.8	10	338.7	5.5	310	70	100.564
Z_Plesovice_11	786	83.2	0.105852	0.3989	0.014	0.05411	0.00088	0.28148	340.2	10	339.7	5.4	330	67	99.853
Z_Plesovice_12	748.4	76.5	0.102218	0.3882	0.014	0.05362	0.00091	0.26027	332.2	10	336.7	5.6	288	70	101.355
Z_Plesovice_13	774	78.4	0.101292	0.3935	0.014	0.05367	0.00086	0.30793	336.1	10	337	5.2	316	67	100.268
Z_Plesovice_14	771	78.2	0.101427	0.3925	0.014	0.05387	0.00087	0.16167	335.3	10	338.2	5.3	295	71	100.865
Z_Plesovice_15	767.6	78.5	0.102267	0.3907	0.014	0.05304	0.00087	0.36611	334.1	10	333.1	5.4	320	68	99.7007
Z_Plesovice_16	763.5	79.73	0.104427	0.4066	0.014	0.05393	0.00088	0.33205	345.6	10	338.6	5.4	376	69	97.9745
Z_Plesovice_17	719.5	73.95	0.10278	0.3961	0.014	0.05377	0.00086	0.22502	338.6	10	337.6	5.3	324	72	99.7047
Z_Plesovice_18	777	80.8	0.10399	0.3941	0.014	0.05409	0.00089	0.20574	336.5	10	339.5	5.4	303	72	100.892
Z_Plesovice_19	758	77.7	0.102507	0.3893	0.014	0.05322	0.00087	0.24035	332.9	10	334.3	5.3	297	72	100.421
Z_Plesovice_20	773	80.3	0.103881	0.3936	0.014	0.05389	0.00088	0.31421	336.8	10	338.3	5.4	307	69	100.445
Z_Plesovice_1	750	77.5	0.103333	0.391	0.015	0.05383	0.00075	0.018604	332	11	337.9	4.6	253	81	101.777
Z_Plesovice_3	760	78.5	0.103289	0.398	0.015	0.05372	0.00077	0.0645	337	11	337.2	4.7	294	83	100.059
Z_Plesovice_4	747	77.1	0.103213	0.39	0.016	0.05346	0.00073	0.15865	331	11	335.7	4.5	255	84	101.42
Z_Plesovice_5	755	78	0.103311	0.394	0.015	0.05363	0.00076	0.17863	334	11	336.7	4.7	279	81	100.808
Z_Plesovice_8	755	77.9	0.103179	0.394	0.016	0.05364	0.00084	0.17722	334	12	336.7	5.1	272	88	100.808
Z_Plesovice_11	755	78	0.103311	0.394	0.014	0.05365	0.0008	0.16718	334	10	336.8	4.9	281	77	100.838
Z_Plesovice_12	755	78.1	0.103444	0.394	0.015	0.05374	0.00068	0.23204	335	11	337.4	4.2	296	80	100.716
Z_Plesovice_14	754	77.8	0.103183	0.393	0.016	0.05359	0.00078	0.13027	335	12	336.5	4.8	284	87	100.448
Z_Plesovice_15	756	78.2	0.103439	0.394	0.018	0.05371	0.00078	0.11873	333	13	337.2	4.8	260	94	101.261
Z_Plesovice_2	763	78.7	0.103145	0.398	0.015	0.05369	0.00077	0.067458	337	11	337	4.7	296	83	100
Z_Plesovice_6	755	78.1	0.103444	0.394	0.014	0.05375	0.00069	0.21376	336	10	337.9	4.3	282	74	100.565
Z_Plesovice_7	755	78.1	0.103444	0.394	0.014	0.05375	0.00069	0.21376	336	10	337.9	4.3	282	74	100.565
Z_Plesovice_9	754	77.9	0.103316	0.394	0.016	0.05365	0.00084	0.17569	334	12	336.8	5.2	271	88	100.838
Z_Plesovice_10	755	78	0.103311	0.394	0.014	0.05365	0.0008	0.16718	334	10	336.8	4.9	281	77	100.838
Z_Plesovice_13	756	78.1	0.103307	0.395	0.015	0.0537	0.00069	0.23247	336	11	337.1	4.2	299	80	100.327
Z_Plesovice_16	754	77.9	0.103316	0.394	0.018	0.05367	0.00078	0.11815	333	13	336.9	4.7	256	94	101.171
Z_Plesovice_1	731	74.3	0.101642	0.392	0.033	0.05298	0.0013	0.15947	333	24	332.7	7.7	299	180	99.9099
Z_Plesovice_2	767	79.3	0.10339	0.374	0.032	0.05416	0.0013	0.10016	320	23	339.9	8	167	180	106.219
Z_Plesovice_3	781	82	0.104994	0.403	0.034	0.0539	0.0012	0.032331	341	25	338.4	7.6	313	180	99.2375
Z_Plesovice_4	755	79.1	0.104768	0.398	0.034	0.05382	0.0013	0.11903	338	24	337.8	7.8	312	180	99.9408
Z_Plesovice_5	773	86.8	0.11229	0.406	0.034	0.05361	0.0013	0.10578	343	24	336.5	7.8	352	180	98.105
Z_Plesovice_6	755	77.2	0.102252	0.406	0.034	0.05421	0.0013	0.21718	343	24	340.2	7.9	322	180	99.1837
Z_Plesovice_7	784	82.7	0.105485	0.385	0.033	0.05329	0.0013	0.15572	327	24	334.6	8.1	237	180	102.324
Z_Plesovice_8	710	71.2	0.100282	0.393	0.034	0.05416	0.0013	0.1468	334	25	339.9	7.9	247	180	101.766
Z_Plesovice_9	742	77	0.103774	0.394	0.034	0.05399	0.0013	0.068859	335	24	338.9	7.9	266	180	101.164
Z_Plesovice_10	756	77.8	0.10291	0.386	0.032	0.05223	0.0012	0.08689	330	24	328.1	7.6	295	180	99.4242
Z_Plesovice_11	736	74.5	0.101223	0.425	0.036	0.05365	0.0013	0.092476	356	26	337.3	8	432	180	94.7472
Z_Plesovice_12	759	78.2	0.10303	0.377	0.032	0.0533	0.0013	0.070645	322	24	334.7	8	218	180	103.944
Z_Plesovice_13	812	86	0.105911	0.403	0.034	0.05442	0.0013	0.21043	342	25	341.5	7.9	285	180	99.8538
Z_Plesovice_14	716	72.4	0.101117	0.377	0.033	0.05374	0.0013	0.10642	322	24	337.4	7.9	176	180	104.783
Z_Plesovice_15	781	82.5	0.105634	0.398	0.033	0.05373	0.0013	0.015263	339	25	337.3	7.7	300	180	99.4985
Z_Plesovice_1	752	77.8	0.103457	0.386	0.016	0.05416	0.0013	0.067328	328	12	339.9	7.7	183	93	103.628
Z_Plesovice_2	811	83.1	0.102466	0.403	0.016	0.05325	0.0013	0.15901	341	12	334.4	7.7	304	92	98.0645
Z_Plesovice_3	738	75.8	0.10271	0.394	0.015	0.05356	0.0013	0.062962	334	11	336.2	7.8	288	90	100.659
Z_Plesovice_4	752	77.6	0.103191	0.392	0.017	0.05367	0.0013	0.30018	332	13	336.9	8.2	221	92	101.476
Z_Plesovice_5	753	76.8	0.101992	0.396	0.016	0.0538	0.0013	0.27419	335	12	337.7	8.1	297	89	100.806
Z_Plesovice_6	778	81.1	0.104242	0.394	0.015	0.05358	0.0013	0.18224	334	11	336.4	7.9	334	86	100.719
Z_Plesovice_7	792	84.2	0.106313	0.395	0.016	0.05397	0.0013	0.077401	335	12	338.7	7.9	314	95	101.104
Z_Plesovice_8	699	70.2	0.100429	0.394	0.016	0.0533	0.0012	0.11653	335	12	334.7	7.6	307	91	99.9104
Z_Plesovice_9	820	84.5	0.103049	0.392	0.016	0.05387	0.0013	0.20007	334	12	338.2	7.8	233	87	101.257
Z_Plesovice_10	722	73.1	0.101247	0.395	0.017	0.05372	0.0013	0.19854	336	12	337.2	7.7	308	93	100.357
Z_Plesovice_11	770	85.9	0.111558	0.395	0.016	0.05361	0.0013	0.093224	336	12	336.5	7.7	363	90	100.149
Z_Plesovice_12	749	74.9	0.1	0.392	0.016	0.05369	0.0013	0.083479	333	12	337.1	7.7	263	91	101.231
Z_Plesovice_13	752	76.6	0.101862	0.396	0.016	0.05358	0.0013	0.041269	335	12	336.4	7.7	266	93	100.418
Z_Plesovice_14	829	86.4	0.104222	0.393	0.016	0.05403	0.0013	0.049727	333	11	339.1	7.8	241	90	101.832
Z_Plesovice_15	698	70.3	0.100716	0.395	0.017	0.05336	0.0013	0.10807	335	13	335	7.9	287	97	100
Z_Plesovice_16	763	78.7	0.103145	0.391	0.016	0.05328	0.0013	0.17894	331	12	334.5	7.7	248	91	101.057
Z_Plesovice_17	827	87.6	0.105925	0.397	0.017	0.05424	0.0013	0.24948	337	13	340.4	8	246	94	101.009

## Sheet: 91500 (1)
Zircon secondary standard				Common-lead uncorrected ratios					Final Ages (Ma)
Id	U (ppm)	Th (ppm)	Th/U	207Pb/235U	±2σ	206Pb/238U	±2σ	Rho	207Pb/235U	±2σ	206Pb/238U	±2σ	207Pb/206Pb	±2σ	Concordance (%)
91500	116.7	51.49	0.441217	1.804	0.087	0.1786	0.0028	0.17276	1035	32	1060	16	922	92	102.415
91500	85.5	32.81	0.383743	1.792	0.087	0.1791	0.0029	0.2598	1041	32	1062	16	983	91	102.017
91500	84.7	31.44	0.371192	1.79	0.083	0.1779	0.0029	0.066575	1034	30	1055	16	1008	90	102.031
91500	96.3	38.93	0.404258	1.833	0.088	0.1805	0.0027	0.19362	1046	31	1069	15	1005	90	102.199
91500	110.5	47.35	0.428507	1.782	0.085	0.1786	0.0027	0.27042	1031	31	1059	15	977	89	102.716
91500	92.8	36.66	0.395043	1.853	0.088	0.1794	0.0027	0.18325	1057	31	1064	15	1017	88	100.662
91500	112	48.25	0.430804	1.936	0.097	0.1803	0.0034	0.94033	1065	25	1068	18	1019	75	100.282
91500	119.3	52.41	0.439313	1.858	0.063	0.1783	0.003	0.16067	1061	23	1057	17	1042	66	99.623
91500	122.5	52.73	0.430449	1.791	0.06	0.1786	0.0027	0.073502	1036	23	1059	15	949	66	102.22
91500	105.9	48.73	0.460151	1.913	0.066	0.1796	0.003	0.09086	1076	23	1064	16	1082	64	98.8848
91500	108.5	49.36	0.454931	1.894	0.077	0.1801	0.0029	0.027227	1062	22	1067	16	1019	63	100.471
91500	116.6	50.92	0.436707	1.842	0.065	0.1755	0.0031	0.32091	1053	23	1041	17	1064	63	98.8604
91500	117.3	51.4	0.438193	1.892	0.063	0.1812	0.0029	0.28165	1070	22	1073	16	1059	56	100.28
91500	87.3	30.84	0.353265	1.822	0.05	0.176	0.003	0.28078	1046	18	1045	17	1037	56	99.9044
91500	86.7	33.95	0.39158	1.826	0.055	0.1774	0.003	0.1555	1050	20	1053	16	1037	60	100.286
91500	92.1	38.44	0.417372	1.836	0.055	0.1802	0.0029	0.24929	1049	20	1069	16	1017	55	101.907
91500	85.4	31.38	0.367447	1.857	0.052	0.1809	0.003	0.28396	1061	19	1071	16	1015	55	100.943
91500	85.1	29.86	0.350881	1.839	0.048	0.1773	0.0031	0.13576	1056	17	1053	17	1044	56	99.7159
91500	88	35.71	0.405795	1.808	0.052	0.1785	0.003	0.16422	1040	19	1058	16	988	61	101.731
91500	90.6	35.59	0.392826	1.827	0.051	0.178	0.003	0.25929	1048	19	1056	17	1003	55	100.763
91500	87.2	34.36	0.394037	1.832	0.054	0.1763	0.0031	0.22095	1050	20	1046	17	1040	61	99.619
91500	109.3	44.4	0.406221	1.87	0.21	0.1784	0.0054	0.13922	1037	75	1056	29	890	210	101.832
91500	112.7	47.6	0.42236	1.84	0.21	0.178	0.005	0.20178	1025	79	1054	27	880	220	102.829
91500	106.6	44.7	0.419325	1.78	0.21	0.1783	0.0054	0.16083	1005	77	1058	30	790	220	105.274
91500	104.9	44.1	0.4204	1.76	0.2	0.1772	0.0054	0.16016	1005	74	1052	29	840	210	104.677
91500	99.5	40.2	0.40402	1.81	0.21	0.181	0.0052	0.03326	1009	80	1070	28	770	230	106.046
91500	89	35.23	0.395843	1.84	0.21	0.1838	0.0058	0.19214	1028	77	1085	31	810	220	105.545
91500	91.5	38	0.415301	1.76	0.1	0.176	0.0062	0.15646	1000	40	1043	34	800	130	104.3
91500	90	34.75	0.386111	1.78	0.11	0.1802	0.0067	0.23853	1003	41	1068	37	820	130	106.481
91500	86.7	34.06	0.392849	1.77	0.12	0.1803	0.007	0.10184	988	47	1066	38	760	150	107.895
91500	96.2	38.26	0.397713	1.75	0.11	0.1749	0.0059	0.062259	1002	43	1037	33	820	140	103.493
91500	89.1	35.21	0.395174	1.88	0.11	0.1776	0.0062	0.10019	1031	41	1054	34	890	130	102.231
91500	86.8	34.96	0.402765	1.94	0.12	0.1828	0.0062	0.06057	1058	42	1083	35	910	130	102.363
91500	76.24	29.76	0.390346	1.872	0.09	0.1853	0.0042	0.12178	1065	33	1095	23	989	100	102.817
91500	79.12	30.63	0.387133	1.84	0.093	0.1774	0.004	0.11003	1054	32	1052	22	1026	110	99.8102
91500	79.85	30.9	0.386976	1.839	0.095	0.1802	0.004	0.14578	1052	33	1069	22	993	110	101.616
91500	79.3	30.46	0.384111	1.816	0.092	0.1781	0.004	0.23352	1041	34	1057	21	979	110	101.537
91500	75.62	28.38	0.375298	1.828	0.09	0.1785	0.004	0.18122	1050	32	1058	22	1015	110	100.762
91500	78.06	29.39	0.376505	1.783	0.093	0.1786	0.0042	0.12035	1034	33	1058	23	958	110	102.321
91500	92.8	37.6	0.405172	1.908	0.096	0.1732	0.0035	0.16054	1056	35	1028	19	1030	110	97.3485
91500	78.7	29.54	0.375349	1.808	0.093	0.1781	0.0039	0.12808	1030	34	1055	21	910	110	102.427
91500	84	32.62	0.388333	1.788	0.16	0.1773	0.0049	0.043075	1018	61	1050	27	890	200	103.143
91500	77.5	29.73	0.383613	1.78	0.17	0.1804	0.0054	0.12185	1008	63	1067	29	810	210	105.853
91500	83.9	32.57	0.3882	1.85	0.17	0.179	0.0052	0.024572	1037	63	1060	28	920	200	102.218
91500	78.3	30.45	0.388889	1.95	0.19	0.1802	0.0052	0.11946	1052	69	1066	28	930	210	101.331
91500	90.8	34.75	0.382709	1.86	0.12	0.1768	0.0053	0.13626	1037	42	1047	29	910	140	100.964
91500	84.9	32.79	0.386219	1.667	0.091	0.1767	0.0052	0.16624	980	36	1047	28	810	120	106.837
91500	79.2	30.18	0.381061	1.74	0.12	0.1703	0.0054	0.13498	988	45	1011	29	890	150	102.328
91500	73	26.17	0.358493	1.83	0.12	0.1779	0.0054	0.13791	1016	45	1053	29	830	140	103.642
91500	83.5	32.76	0.392335	1.82	0.12	0.1758	0.0055	0.20799	1016	46	1042	30	850	140	102.559

## Sheet: GJ-1 (1)
Zircon secondary standard				Common-lead uncorrected ratios					Final Ages (Ma)
Id	U (ppm)	Th (ppm)	Th/U	207Pb/235U	±2σ	206Pb/238U	±2σ	Rho	207Pb/235U	±2σ	206Pb/238U	±2σ	207Pb/206Pb	±2σ	Concordance (%)
GJ1	411.6	13.87	0.0336978	0.792	0.034	0.09694	0.0012	0.10485	590	19	596.3	6.9	552	86	101.068
GJ1	440.7	14.85	0.0336964	0.796	0.034	0.0984	0.0013	0.13925	593	20	604.9	7.5	549	86	102.007
GJ1	468.9	16.55	0.0352954	0.788	0.034	0.0959	0.0013	0.28776	587	19	590.2	7.5	558	84	100.545
GJ1	484.1	17.23	0.0355918	0.795	0.034	0.0955	0.0013	0.29402	592.5	19	587.7	7.4	554	79	99.1899
GJ1	468.9	16.42	0.0350181	0.789	0.033	0.0958	0.0014	0.26323	588.6	19	589.7	8	501	80	100.187
GJ1	376.8	12.05	0.0319798	0.785	0.033	0.09584	0.0012	0.26321	586	19	589.8	7.3	576	83	100.648
GJ1	384.9	12.48	0.032424	0.787	0.033	0.0987	0.0013	0.063533	588.1	19	606.9	7.8	537	83	103.197
GJ1	461	16.11	0.0349458	0.783	0.033	0.0969	0.0013	0.26362	584.8	19	596.3	7.9	558	80	101.966
GJ1	447.7	15.72	0.0351128	0.782	0.033	0.09743	0.0012	0.14634	586	19	599.2	7.2	541	83	102.253
GJ1	387.8	12.48	0.0321815	0.81	0.034	0.09811	0.0012	0.15289	600.7	19	603.2	7.3	566	83	100.416
GJ1	373.6	11.75	0.0314507	0.815	0.034	0.09863	0.0012	0.263	602.8	19	606.3	7	584	77	100.581
GJ1	374.6	11.9	0.0317672	0.805	0.034	0.0975	0.0013	0.20486	598.8	19	599.7	7.5	583	79	100.15
GJ1	375.9	11.9	0.0316574	0.82	0.034	0.0977	0.0013	0.24491	605.7	19	600.7	7.6	596	79	99.1745
GJ1	437.2	14.87	0.0340119	0.78	0.021	0.09685	0.0014	0.1164	583.5	12	595.8	8	515	50	102.108
GJ1	494.7	17.5	0.035375	0.8	0.022	0.09666	0.0014	0.24465	594.6	12	594.7	8.4	571	50	100.017
GJ1	521.4	18.86	0.0361718	0.805	0.022	0.09721	0.0014	0.29012	598.7	12	597.9	8.2	582	49	99.8664
GJ1	520.9	18.22	0.0349779	0.807	0.022	0.09669	0.0014	0.16232	598.7	13	594.9	8.2	588	53	99.3653
GJ1	457.1	16.65	0.0364253	0.791	0.021	0.09523	0.0014	0.21075	590.4	12	586.3	8.1	586	50	99.3056
GJ1	373.4	12.1	0.0324049	0.796	0.019	0.09578	0.0014	0.30477	593	11	589.5	8.2	591	46	99.4098
GJ1	359.7	11	0.030581	0.811	0.019	0.0977	0.0015	0.18847	602	11	600.7	8.7	597	50	99.7841
GJ1	374	12.38	0.0331016	0.791	0.017	0.09655	0.0014	0.37058	590.7	9.6	594	8.3	570	40	100.559
GJ1	380.7	13.08	0.0343578	0.805	0.018	0.09722	0.0014	0.27406	597.7	10	598	8.2	575	47	100.05
GJ1	356.2	10.35	0.0290567	0.793	0.017	0.09618	0.0014	0.065871	591	9.5	591.9	8	571	46	100.152
GJ1	359.2	11.02	0.0306793	0.805	0.018	0.09683	0.0014	0.16941	597.7	9.9	596.3	8.3	592	44	99.7658
GJ1	369.1	12.12	0.0328366	0.784	0.017	0.09554	0.0013	0.25471	586.8	9.7	588.1	7.9	573	43	100.222
GJ1	349.1	11.37	0.0325695	0.795	0.017	0.0967	0.0022	0.31728	591.5	9.8	595.1	13	593	73	100.609
GJ1	356.9	11.69	0.0327543	0.781	0.017	0.0966	0.0021	0.23017	583.9	9.6	594.4	13	543	76	101.798
GJ1	380	12.49	0.0328684	0.81	0.015	0.09629	0.0021	0.25733	600.4	8.7	592.5	13	601	72	98.6842
GJ1	418.5	13.65	0.0326165	0.805	0.016	0.09673	0.0021	0.21531	598.5	9	595.1	12	569	74	99.4319
GJ1	384.2	13.04	0.0339407	0.82	0.017	0.09734	0.0022	0.20306	607	9.5	598.7	13	619	77	98.6326
GJ1	374.3	12.24	0.032701	0.797	0.016	0.09617	0.0021	0.29204	594.3	9	591.8	12	593	73	99.5793
GJ1	344.2	10.85	0.0315224	0.799	0.018	0.0959	0.0022	0.27333	594	10	590	13	594	77	99.3266
GJ1	349	11.3	0.0323782	0.784	0.015	0.0969	0.0022	0.26428	586.3	8.6	596.2	13	548	74	101.689
GJ1	335.9	10.87	0.0323608	0.79	0.017	0.0976	0.0022	0.25177	590.6	9.7	599.9	13	557	75	101.575
GJ1	454.3	15.19	0.0334361	0.818	0.084	0.0965	0.0023	0.12752	600	47	593.5	14	558	190	98.9167
GJ1	494.4	16.66	0.0336974	0.79	0.082	0.0961	0.0023	0.021785	589	48	591.2	14	516	190	100.374
GJ1	489.1	16.9	0.0345533	0.814	0.085	0.0978	0.0025	0.15994	595	49	601	15	549	200	101.008
GJ1	449.5	15.11	0.0336151	0.804	0.084	0.0951	0.0024	0.18247	592	47	585.3	14	552	200	98.8682
GJ1	422.1	14.17	0.0335702	0.807	0.085	0.0977	0.0024	0.23707	590	48	600.8	14	472	200	101.831
GJ1	367.8	11.71	0.031838	0.806	0.087	0.1001	0.0025	0.12071	590	49	614	15	420	190	104.068
GJ1	365.2	12.05	0.0329956	0.849	0.035	0.0976	0.003	0.076643	614	20	599.7	18	577	95	97.671
GJ1	377.5	12.33	0.0326623	0.824	0.035	0.0995	0.0032	0.04178	601	19	611	19	551	92	101.664
GJ1	367.8	12.15	0.0330343	0.811	0.034	0.0977	0.0031	0.058007	600	19	600.8	18	540	94	100.133
GJ1	379.6	12	0.0316122	0.782	0.035	0.0962	0.0029	0.19149	577	20	591.6	17	446	94	102.53
GJ1	360	11.74	0.0326111	0.835	0.037	0.097	0.003	0.12841	606	21	596.6	18	561	98	98.4488
GJ1	357.5	11.55	0.0323077	0.824	0.042	0.0966	0.0031	0.10048	599	23	594	18	540	110	99.1653
GJ1	337.4	10.58	0.0313574	0.79	0.036	0.09667	0.002	0.088274	588.9	20	594.7	12	555	110	100.985
GJ1	323.8	10.43	0.0322112	0.802	0.037	0.09836	0.002	0.18812	597	21	604.7	12	534	100	101.29
GJ1	337.8	10.69	0.0316459	0.798	0.037	0.098	0.0021	0.26723	593	21	602.3	12	549	98	101.568
GJ1	333.7	10.32	0.030926	0.798	0.036	0.0961	0.002	0.26395	593.4	21	591.5	12	568	100	99.6798
GJ1	324.6	9.9	0.0304991	0.783	0.036	0.09847	0.002	0.18003	584	21	605.3	12	499	100	103.647
GJ1	322	9.86	0.0306211	0.796	0.037	0.0963	0.002	0.17404	591	21	592.7	12	560	100	100.288
GJ1	318.7	10.02	0.0314402	0.808	0.03	0.09773	0.0016	0.29727	600	17	601	9.3	569	72	100.167
GJ1	315.4	9.79	0.0310399	0.819	0.03	0.09697	0.0016	0.11752	605	17	596.5	9.5	616	72	98.595
GJ1	309.6	9.71	0.031363	0.786	0.029	0.09638	0.0016	0.17561	586.8	16	593	9.3	536	71	101.057
GJ1	322	9.7	0.0301242	0.802	0.03	0.0969	0.0016	0.16046	595	17	595.8	9.6	572	74	100.134
GJ1	308.1	9.32	0.0302499	0.812	0.031	0.0966	0.0016	0.18674	601	17	594.4	9.6	598	75	98.9018
GJ1	325.2	10.11	0.0310886	0.8	0.029	0.09694	0.0016	0.24287	594.7	16	596.4	9.4	566	71	100.286
GJ1	380.6	12.41	0.0326064	0.818	0.033	0.0962	0.0015	0.037553	600	18	592	8.7	570	84	98.6667
GJ1	325.1	10.48	0.0322362	0.745	0.032	0.0953	0.0017	0.073445	564	19	586.4	9.7	416	96	103.972
GJ1	351.8	11.13	0.0316373	0.79	0.066	0.0948	0.0023	0.079342	585	38	583.3	14	548	180	99.7094
GJ1	325.2	10.24	0.0314883	0.801	0.068	0.0976	0.0024	0.12871	589	38	599.9	14	492	180	101.851
GJ1	357.1	11.4	0.0319238	0.825	0.072	0.0965	0.0024	0.20439	602	40	593.5	14	573	190	98.588
GJ1	339	11	0.0324484	0.802	0.069	0.0964	0.0025	0.047957	591	39	592.9	15	525	190	100.321
GJ1	396.1	12.88	0.032517	0.818	0.036	0.0957	0.0024	0.1765	599	20	589	14	573	99	98.3306
GJ1	368.9	11.91	0.0322852	0.782	0.038	0.0969	0.0024	0.22142	575	22	595.9	14	490	100	103.635
GJ1	365.6	11.66	0.0318928	0.749	0.033	0.0957	0.0024	0.10386	561	19	589	14	468	100	104.991
GJ1	375.3	12.05	0.0321076	0.812	0.03	0.0968	0.0024	0.057313	598	17	595.4	14	542	92	99.5652
GJ1	389.8	12.54	0.0321703	0.766	0.033	0.0978	0.0025	0.058301	568	19	601	15	388	99	105.81

## Sheet: Madagascar
Apatite primary standard	207Pb-based DRS common-Pb correction										Final Ages (Ma)
Id	207Pb/235U	±2σ	206Pb/238U	±2σ	Rho	238U/206Pb	±2σ	207Pb/206Pb	±2σ	Rho	207Pb/235U	±2σ	206Pb/238U	±2σ	Concordance (%)
A_MAD_JD_1	0.6026	0.014	0.0764	0.0018	0.99998	13.089	0.30838	0.0571961	3e-10	0.030513	478.4	9	474.5	11	99.1848
A_MAD_JD_2	0.6073	0.014	0.07701	0.0018	0.99998	12.9853	0.303514	0.0571961	3.1e-10	0.075514	481.9	8.8	478.2	11	99.2322
A_MAD_JD_3	0.6081	0.014	0.07711	0.0018	0.99998	12.9685	0.302727	0.0571961	2.7e-10	0.041803	482	8.9	478.8	11	99.3361
A_MAD_JD_4	0.5946	0.014	0.07539	0.0017	0.99998	13.2644	0.299104	0.0571961	3e-10	0.032865	473.4	8.6	468.5	10	98.9649
A_MAD_JD_5	0.5943	0.014	0.07535	0.0017	0.99998	13.2714	0.299421	0.0571961	2.7e-10	0.011754	473.2	8.7	468.2	10	98.9434
A_MAD_JD_6	0.6111	0.014	0.07748	0.0018	0.99998	12.9066	0.299843	0.0571961	2.8e-10	0.055405	483.8	8.8	481	11	99.4212
A_MAD_JD_7	0.5938	0.014	0.0753	0.0017	0.99998	13.2802	0.299819	0.0571961	2.8e-10	0.11152	472.9	8.8	467.9	10	98.9427
A_MAD_JD_8	0.5943	0.014	0.07536	0.0017	0.99998	13.2696	0.299342	0.0571961	3e-10	0.068729	473.7	8.8	468.3	10	98.86
A_MAD_JD_9	0.6088	0.014	0.0772	0.0018	0.99998	12.9534	0.302021	0.0571961	2.8e-10	0.0072486	482.4	8.9	479.3	11	99.3574
A_MAD_JD_10	0.6016	0.014	0.07628	0.0018	0.99998	13.1096	0.309351	0.0571961	2.7e-10	0.0088982	477.8	8.9	473.8	11	99.1628
A_MAD_JD_11	0.5938	0.014	0.07529	0.0017	0.99998	13.282	0.299899	0.0571961	2.6e-10	0.015992	472.9	8.7	467.9	10	98.9427
A_MAD_JD_12	0.6023	0.014	0.07637	0.0018	0.99998	13.0942	0.308622	0.0571961	2.9e-10	0.053484	478.3	8.8	474.3	11	99.1637
A_MAD_JD_13	0.609	0.014	0.07723	0.0018	0.99998	12.9483	0.301787	0.0571961	2.8e-10	0.0080354	482.5	9	479.5	11	99.3782
A_MAD_JD_14	0.6061	0.014	0.07686	0.0018	0.99998	13.0107	0.3047	0.0571961	2.8e-10	0.099714	481.1	9	477.2	11	99.1894
A_MAD_JD_15	0.6032	0.014	0.07648	0.0018	0.99998	13.0753	0.307735	0.0571961	2.9e-10	0.0010056	478.8	9	475	11	99.2063
A_MAD_JD_16	0.6042	0.014	0.07661	0.0018	0.99998	13.0531	0.306691	0.0571961	2.6e-10	0.026169	480.3	8.7	475.7	11	99.0423
A_MAD_JD_17	0.5887	0.014	0.07465	0.0017	0.99998	13.3958	0.305063	0.0571961	3e-10	0.038752	469.6	8.7	464	10	98.8075
A_MAD_JD_18	0.6004	0.014	0.07613	0.0018	0.99998	13.1354	0.310571	0.0571961	3e-10	0.019244	477	8.9	472.9	11	99.1405
A_MAD_JD_19	0.5987	0.014	0.07592	0.0018	0.99998	13.1718	0.312291	0.0571961	2.9e-10	0.011659	476	8.8	471.6	11	99.0756
A_MAD_JD_20	0.6036	0.014	0.07654	0.0018	0.99999	13.0651	0.307253	0.0571961	3.1e-10	0.10019	479	9.1	475.3	11	99.2276
A_MAD_JD_21	0.613	0.014	0.07774	0.0018	0.99999	12.8634	0.29784	0.0571961	2.8e-10	0.011378	485	9.1	482.5	11	99.4845
A_MAD_JD_22	0.5953	0.014	0.07549	0.0018	0.99999	13.2468	0.315859	0.0571961	3.1e-10	0.054754	474.3	8.8	469	11	98.8826
A_MAD_JD_23	0.6	0.014	0.07609	0.0018	0.99998	13.1423	0.310898	0.0571961	3.2e-10	0.095182	477.7	8.8	473.2	11	99.058
A_MAD_JD_24	0.6054	0.014	0.07677	0.0018	0.99998	13.0259	0.305414	0.0571961	3.2e-10	0.0078715	480.3	8.9	476.7	11	99.2505
A_MAD_JD_25	0.6012	0.014	0.07623	0.0018	0.99998	13.1182	0.309757	0.0571961	2.8e-10	0.027638	477.5	8.9	473.5	11	99.1623
A_MAD_JD_26	0.599	0.014	0.07595	0.0018	0.99999	13.1666	0.312045	0.0571961	3.1e-10	0.014208	476.6	9.1	471.8	11	98.9929
A_MAD_JD_27	0.6068	0.014	0.07695	0.0018	0.99998	12.9954	0.303987	0.0571961	2.8e-10	0.037757	481.2	8.8	477.8	11	99.2934
A_MAD_JD_28	0.5984	0.014	0.07588	0.0018	0.99999	13.1787	0.312621	0.0571961	3.2e-10	0.050103	475.8	9	471.4	11	99.0752
A_MAD_JD_29	0.5996	0.014	0.07603	0.0018	0.99998	13.1527	0.311389	0.0571961	2.9e-10	0.042165	476.6	8.8	472.3	11	99.0978
A_MAD_JD_30	0.6008	0.014	0.07619	0.0017	0.99998	13.1251	0.292855	0.0571961	2.8e-10	0.0021661	477.4	8.7	473.2	10	99.1202
A_MAD_JD_31	0.5973	0.014	0.07574	0.0018	0.99999	13.2031	0.313778	0.0571961	2.7e-10	0.059516	475.1	8.9	470.6	11	99.0528
A_MAD_JD_32	0.6024	0.014	0.07639	0.0018	0.99998	13.0907	0.30846	0.0571961	2.9e-10	0.023298	478.3	8.9	474.4	11	99.1846
A_MAD_JD_33	0.6047	0.014	0.07667	0.0018	0.99998	13.0429	0.306212	0.0571961	2.8e-10	0.075099	479.8	8.8	476.2	11	99.2497
A_MAD_JD_34	0.5933	0.014	0.07523	0.0018	0.99999	13.2926	0.318046	0.0571961	2.7e-10	0.02062	472.5	8.8	467.5	11	98.9418
A_MAD_JD_35	0.6034	0.014	0.07652	0.0017	0.99998	13.0685	0.290335	0.0571961	2.7e-10	0.0085504	479	8.7	475.2	10	99.2067
A_MAD_JD_36	0.6036	0.014	0.07654	0.0018	0.99998	13.0651	0.307253	0.0571961	2.8e-10	0.016338	479.1	8.8	475.4	11	99.2277
A_MAD_JD_1	0.5954	0.015	0.0755	0.0019	0.9999	13.245	0.333319	0.0571961	3.2e-10	0.0098334	473.7	9.4	469.1	11	99.0289
A_MAD_JD_2	0.6052	0.015	0.0767	0.002	0.99991	13.0378	0.339969	0.0571961	3.6e-10	0.1717	480.4	9.7	477.1	12	99.3131
A_MAD_JD_3	0.6096	0.016	0.0773	0.002	0.99992	12.9366	0.334712	0.0571961	2.9e-10	0.030939	482.6	9.8	479.8	12	99.4198
A_MAD_JD_4	0.6031	0.015	0.07647	0.0019	0.99991	13.077	0.324916	0.0571961	3.2e-10	0.067144	479.1	9.4	474.9	11	99.1234
A_MAD_JD_5	0.595	0.015	0.0754	0.0019	0.99991	13.2626	0.334203	0.0571961	3.4e-10	0.034366	473.4	9.7	468.7	12	99.0072
A_MAD_JD_6	0.5971	0.015	0.0757	0.0019	0.99991	13.21	0.33156	0.0571961	3.2e-10	0.070215	474.7	9.6	470.4	12	99.0942
A_MAD_JD_7	0.6032	0.015	0.07649	0.0019	0.99991	13.0736	0.324746	0.0571961	3.3e-10	0.046765	479.7	9.6	475	12	99.0202
A_MAD_JD_8	0.606	0.016	0.0768	0.002	0.99993	13.0208	0.339084	0.0571961	3.1e-10	0.062516	480.2	10	477.1	12	99.3544
A_MAD_JD_9	0.6008	0.015	0.07618	0.0019	0.99992	13.1268	0.327395	0.0571961	3.4e-10	0.016876	477.1	9.6	473.1	12	99.1616
A_MAD_JD_10	0.5972	0.015	0.0757	0.0019	0.99992	13.21	0.33156	0.0571961	2.9e-10	0.046496	474.8	9.7	470.4	12	99.0733
A_MAD_JD_11	0.6049	0.015	0.0767	0.002	0.99992	13.0378	0.339969	0.0571961	3.2e-10	7.64e-05	479.6	9.8	476.2	12	99.2911
A_MAD_JD_12	0.5999	0.015	0.0761	0.0019	0.99992	13.1406	0.328083	0.0571961	3.1e-10	0.0086811	476.5	9.7	472.5	12	99.1605
A_MAD_JD_13	0.6031	0.015	0.0765	0.002	0.99992	13.0719	0.341749	0.0571961	2.9e-10	0.0046318	478.5	9.8	474.9	12	99.2476
A_MAD_JD_14	0.5992	0.015	0.076	0.002	0.99993	13.1579	0.34626	0.0571961	3.2e-10	0.029464	476.6	9.6	472	12	99.0348
A_MAD_JD_15	0.602	0.016	0.0763	0.002	0.99993	13.1062	0.343543	0.0571961	3.2e-10	0.016293	477.7	9.8	474	12	99.2255
A_MAD_JD_16	0.6031	0.016	0.0765	0.002	0.99992	13.0719	0.341749	0.0571961	3.2e-10	0.037984	479.1	10	475.6	12	99.2695
A_MAD_JD_17	0.5956	0.015	0.07552	0.0019	0.99991	13.2415	0.333142	0.0571961	2.8e-10	0.08537	473.8	9.5	469.2	11	99.0291
A_MAD_JD_18	0.6096	0.016	0.0773	0.002	0.99993	12.9366	0.334712	0.0571961	3.3e-10	0.025365	482.5	10	479.8	12	99.4404
A_MAD_JD_19	0.6063	0.016	0.0769	0.002	0.99992	13.0039	0.338203	0.0571961	3.1e-10	0.024178	480.5	9.9	477.3	12	99.334
A_MAD_JD_20	0.5863	0.015	0.0743	0.0019	0.99992	13.4589	0.344172	0.0571961	2.9e-10	0.015647	467.8	9.6	462.1	11	98.7815
A_MAD_JD_21	0.6082	0.015	0.07712	0.0019	0.99992	12.9668	0.319462	0.0571961	2.8e-10	0.038578	482.3	9.5	478.8	12	99.2743
A_MAD_JD_22	0.6019	0.015	0.0763	0.002	0.99993	13.1062	0.343543	0.0571961	3e-10	0.061598	477.7	9.8	474	12	99.2255
A_MAD_JD_1	0.6023	0.012	0.0764	0.0016	0.99994	13.089	0.274115	0.0571961	3e-10	0.16392	477.8	7.8	474.3	9.3	99.2675
A_MAD_JD_2	0.6037	0.012	0.0766	0.0015	0.99993	13.0548	0.255643	0.0571961	3.6e-10	0.029186	478.9	7.5	475.4	8.9	99.2692
A_MAD_JD_3	0.6054	0.012	0.0768	0.0015	0.99994	13.0208	0.254313	0.0571961	3.2e-10	0.068294	479.9	7.7	476.6	9.2	99.3124
A_MAD_JD_4	0.6016	0.012	0.0763	0.0015	0.99993	13.1062	0.257657	0.0571961	3.3e-10	0.065187	477.5	7.5	473.7	9	99.2042
A_MAD_JD_5	0.5908	0.012	0.0749	0.0015	0.99994	13.3511	0.267379	0.0571961	3.1e-10	0.0037795	470.6	7.6	465.5	9	98.9163
A_MAD_JD_6	0.6037	0.012	0.0765	0.0015	0.99994	13.0719	0.256312	0.0571961	3.2e-10	0.062304	479.4	7.8	475.3	9.2	99.1448
A_MAD_JD_7	0.6001	0.012	0.0761	0.0015	0.99993	13.1406	0.259013	0.0571961	3e-10	0.076199	477.1	7.4	472.6	9	99.0568
A_MAD_JD_8	0.6006	0.012	0.0762	0.0016	0.99994	13.1234	0.275556	0.0571961	3e-10	0.088845	476.8	7.9	473	9.4	99.203
A_MAD_JD_9	0.5999	0.012	0.0761	0.0015	0.99994	13.1406	0.259013	0.0571961	2.8e-10	0.0369	476.4	7.7	472.4	9.1	99.1604
A_MAD_JD_10	0.609	0.013	0.0772	0.0016	0.99995	12.9534	0.268464	0.0571961	3.1e-10	0.10507	482.6	8.2	479.3	9.7	99.3162
A_MAD_JD_11	0.5936	0.012	0.0753	0.0015	0.99994	13.2802	0.264546	0.0571961	3e-10	0.015653	472.4	7.6	467.6	9.1	98.9839
A_MAD_JD_12	0.6064	0.012	0.0769	0.0015	0.99993	13.0039	0.253652	0.0571961	3.1e-10	0.041859	480.6	7.5	477.4	9	99.3342
A_MAD_JD_13	0.6009	0.012	0.0762	0.0015	0.99994	13.1234	0.258334	0.0571961	3.1e-10	0.050924	477.6	7.8	473.2	9.1	99.0787
A_MAD_JD_14	0.601	0.011	0.07621	0.0014	0.99993	13.1216	0.241048	0.0571961	2.9e-10	0.087189	477.3	7.3	473.3	8.7	99.162
A_MAD_JD_15	0.6008	0.012	0.0762	0.0016	0.99994	13.1234	0.275556	0.0571961	3.1e-10	0.089656	476.9	7.8	473.1	9.3	99.2032
A_MAD_JD_16	0.6043	0.012	0.0766	0.0015	0.99993	13.0548	0.255643	0.0571961	3e-10	0.013283	479.3	7.4	475.8	8.8	99.2698
A_MAD_JD_17	0.5969	0.012	0.0757	0.0015	0.99993	13.21	0.261758	0.0571961	2.9e-10	0.079345	475.1	7.6	470.8	9.1	99.0949
A_MAD_JD_18	0.6059	0.012	0.0768	0.0015	0.99993	13.0208	0.254313	0.0571961	3.1e-10	0.026055	480.2	7.6	477	9.1	99.3336
A_MAD_JD_19	0.5979	0.012	0.0758	0.0016	0.99994	13.1926	0.278472	0.0571961	2.9e-10	0.12147	475	7.8	470.9	9.3	99.1368
A_MAD_JD_1	0.594	0.02	0.0753	0.0026	1	13.2802	0.458547	0.0571961	3e-10	0.074564	471.6	13	468	16	99.2366
A_MAD_JD_2	0.608	0.02	0.0771	0.0025	1	12.9702	0.420563	0.0571961	3.1e-10	0.08674	481.1	12	478	15	99.3556
A_MAD_JD_3	0.607	0.022	0.0769	0.0027	1	13.0039	0.456574	0.0571961	3e-10	0.040248	479	14	477	16	99.5825
A_MAD_JD_4	0.593	0.02	0.0751	0.0026	1	13.3156	0.460992	0.0571961	2.8e-10	0.099912	469.9	13	466	15	99.17
A_MAD_JD_5	0.607	0.022	0.077	0.0028	1	12.987	0.472255	0.0571961	3.2e-10	0.0015227	479	14	478	17	99.7912
A_MAD_JD_6	0.598	0.02	0.0758	0.0026	1	13.1926	0.452517	0.0571961	3e-10	0.041486	474.4	13	471	15	99.2833
A_MAD_JD_7	0.606	0.022	0.0769	0.0027	1	13.0039	0.456574	0.0571961	2.9e-10	0.046764	480	14	477	16	99.375
A_MAD_JD_8	0.6	0.022	0.076	0.0027	1	13.1579	0.467452	0.0571961	3e-10	0.048147	474	14	472	16	99.5781
A_MAD_JD_9	0.603	0.021	0.0765	0.0026	1	13.0719	0.444274	0.0571961	2.9e-10	0.021145	476.7	13	475	16	99.6434
A_MAD_JD_10	0.596	0.021	0.0755	0.0026	1	13.245	0.45612	0.0571961	3e-10	0.038476	472.6	13	470	16	99.4499
A_MAD_JD_11	0.601	0.02	0.0762	0.0026	1	13.1234	0.447779	0.0571961	3e-10	0.11944	475.4	13	473	16	99.4952
A_MAD_JD_12	0.607	0.02	0.0769	0.0026	1	13.0039	0.439664	0.0571961	3e-10	0.038439	478.9	13	477	15	99.6033
A_MAD_JD_13	0.601	0.02	0.0762	0.0025	1	13.1234	0.430556	0.0571961	3.1e-10	0.11605	476.3	12	473	15	99.3072
A_MAD_JD_14	0.6	0.021	0.076	0.0027	1	13.1579	0.467452	0.0571961	3.2e-10	0.043726	474.1	13	472	16	99.5571
A_MAD_JD_15	0.603	0.02	0.0765	0.0026	1	13.0719	0.444274	0.0571961	2.7e-10	0.031111	477.8	13	475	16	99.414
A_MAD_JD_16	0.587	0.021	0.0745	0.0027	1	13.4228	0.486465	0.0571961	3.2e-10	0.063286	469	14	464	17	98.9339
A_MAD_JD_17	0.61	0.02	0.0773	0.0026	1	12.9366	0.435125	0.0571961	3.1e-10	0.031983	480.9	13	479	15	99.6049

## Sheet: McClure
Apatite secondary standard	Ratios (corrected for Standard common-Pb)										Final Ages (Ma)
Id	207Pb/235U	±2σ	206Pb/238U	±2σ	Rho	238U/206Pb	±2σ	207Pb/206Pb	±2σ	Rho	207Pb/235U	±2σ	206Pb/238U	±2σ	Concordance (%)
MCCLURE	4.657	0.13	0.1156	0.0028	0.039844	8.65052	0.209528	0.2946	0.0066	0.54262	1757	23	705.2	16	40.1366
MCCLURE	4.204	0.11	0.1116	0.0027	0.14663	8.96057	0.216788	0.2744	0.0052	0.54684	1673	21	681.7	16	40.7472
MCCLURE	4.301	0.11	0.1132	0.0026	0.081512	8.83392	0.202899	0.2766	0.0044	0.54761	1690	20	691.4	15	40.9112
MCCLURE	3.71	0.13	0.1074	0.0028	0.13839	9.31099	0.242745	0.2512	0.0073	0.40492	1568	28	657	16	41.9005
MCCLURE	3.736	0.11	0.1084	0.0027	0.13929	9.22509	0.229776	0.252	0.0061	0.47897	1572	24	663.2	16	42.1883
MCCLURE	2.037	0.056	0.0931	0.0021	0.27326	10.7411	0.242281	0.1587	0.0028	0.29174	1126	18	573.7	13	50.9503
MCCLURE	3.432	0.1	0.1061	0.0025	0.12716	9.42507	0.22208	0.2356	0.0054	0.39535	1505	23	650.1	15	43.196
MCCLURE	3.128	0.082	0.1033	0.0024	0.15097	9.68054	0.224911	0.2207	0.0039	0.43954	1438	20	633.7	14	44.0682
MCCLURE	4.08	0.11	0.1114	0.0026	0.12121	8.97666	0.209509	0.2668	0.0047	0.48384	1646	21	680.7	15	41.3548
MCCLURE	5.189	0.14	0.1187	0.0029	0.1073	8.4246	0.205824	0.3182	0.0062	0.56779	1847	23	722.6	17	39.1229
MCCLURE	3.548	0.12	0.1069	0.0029	0.19179	9.35454	0.253771	0.2418	0.0068	0.4382	1528	27	655	17	42.8665
MCCLURE	3.166	0.11	0.1038	0.0028	0.13318	9.63391	0.259874	0.2224	0.0063	0.41178	1439	27	636.5	16	44.2321
MCCLURE	4.21	0.15	0.1153	0.0033	0.17353	8.67303	0.248231	0.2664	0.0079	0.43966	1669	28	703	19	42.121
MCCLURE	2.872	0.1	0.101	0.0027	0.045341	9.90099	0.26468	0.2085	0.0068	0.52245	1368	26	619.7	16	45.2997
MCCLURE	2.901	0.11	0.103	0.0027	0.14085	9.70874	0.254501	0.2056	0.0064	0.3444	1371	29	631.4	16	46.054
MCCLURE	3.67	0.24	0.1044	0.0043	0.14221	9.57854	0.394519	0.263	0.017	0.43948	1528	55	639	25	41.8194
MCCLURE	4.48	0.28	0.1179	0.0053	0.068412	8.48176	0.381284	0.287	0.019	0.47969	1670	55	716	30	42.8743
MCCLURE	3.65	0.22	0.1076	0.0043	0.1808	9.29368	0.371402	0.254	0.015	0.3997	1505	51	657	25	43.6545

## Sheet: PlotDat2
Source sheet	Xuxa	9.68335	0.1214	9.18693	0.145	9.93582	0.1214	9.5935	0.1287	10.0668	0.1248	9.7259	0.1333	9.80632	0.1292	9.97246	0.1164	9.90533	0.123	9.70892	0.1289	9.9864	0.1278	9.6147	0.1271	10.0234	0.1176	9.79576	0.1303	9.87503	0.1309	9.92498	0.1245	9.73347	0.1304	10.0214	0.1208	9.69763	0.1313	9.80536	0.119	10.0952	0.119	9.73856	0.1278	9.93977	0.125	9.67793	0.1306
Plot name	Concordia0	9.34754	0.1287	10.2179	0.1	9.93031	0.121756	9.58812	0.129056	10.0611	0.125156	9.72038	0.133656	9.80094	0.129556	9.96691	0.116731	9.89985	0.123331	9.70342	0.129282	9.98082	0.128156	9.6093	0.127405	10.0178	0.117931	9.79039	0.130631	9.86958	0.131282	9.91948	0.124831	9.72794	0.130731	10.0158	0.121105	9.69214	0.131682	9.79998	0.119331	10.0895	0.119331	9.73325	0.128156	9.93425	0.125305	9.67246	0.130931
Plot Type	1	9.80777	0.1248			9.914	0.122097	9.57223	0.129397	10.0444	0.125497	9.70406	0.133997	9.78504	0.129897	9.95048	0.117047	9.88364	0.123647	9.68715	0.129647	9.96435	0.128497	9.59334	0.127697	10.0012	0.118247	9.77453	0.130947	9.85346	0.131647	9.9032	0.125147	9.7116	0.131047	9.9992	0.121397	9.67591	0.132047	9.78409	0.119647	10.0727	0.119647	9.71757	0.128497	9.91793	0.125597	9.6563	0.131247
1st free col	165	9.47329	0.1333			9.88761	0.122407	9.54653	0.129707	10.0173	0.125807	9.67766	0.134307	9.75932	0.130207	9.9239	0.117335	9.85741	0.123935	9.66084	0.129979	9.9377	0.128807	9.56752	0.127963	9.97436	0.118535	9.74886	0.131235	9.82739	0.131979	9.87687	0.125435	9.68515	0.131335	9.97237	0.121663	9.64966	0.132379	9.75837	0.119935	10.0455	0.119935	9.69219	0.128807	9.89152	0.125863	9.63015	0.131535
Sigma Level	2	9.56023	0.1292			9.85229	0.122673	9.51212	0.129973	9.98107	0.126073	9.64232	0.134573	9.7249	0.130473	9.88833	0.117582	9.8223	0.124182	9.62562	0.130264	9.90203	0.129073	9.53297	0.128191	9.93843	0.118782	9.71451	0.131482	9.79249	0.132264	9.84163	0.125682	9.64976	0.131582	9.93646	0.121891	9.61452	0.132664	9.72395	0.120182	10.009	0.120182	9.65823	0.129073	9.85617	0.126091	9.59515	0.131782
Absolute Errs	TRUE	9.71817	0.1164			9.80959	0.122884	9.47052	0.130184	9.93727	0.126284	9.59959	0.134784	9.68327	0.130684	9.84532	0.117778	9.77985	0.124378	9.58304	0.13049	9.8589	0.129284	9.49119	0.128372	9.89499	0.118978	9.67297	0.131678	9.7503	0.13249	9.79902	0.125878	9.60697	0.131778	9.89304	0.122072	9.57203	0.13289	9.68234	0.120378	9.96499	0.120378	9.61717	0.129284	9.81344	0.126272	9.55283	0.131978
Symbol Type	1	9.65437	0.123			9.76137	0.12303	9.42355	0.13033	9.8878	0.12643	9.55135	0.13493	9.63628	0.13083	9.79675	0.117913	9.73192	0.124513	9.53496	0.130646	9.81021	0.12943	9.44401	0.128497	9.84594	0.119113	9.62607	0.131813	9.70266	0.132646	9.7509	0.126013	9.55865	0.131913	9.844	0.122197	9.52406	0.133046	9.63535	0.120513	9.91525	0.120513	9.5708	0.12943	9.76518	0.126397	9.50505	0.132113
Inverse Plot	TRUE	9.45716	0.1289			9.70974	0.123104	9.37325	0.130404	9.83484	0.126504	9.49969	0.135004	9.58595	0.130904	9.74475	0.117982	9.68061	0.124582	9.48348	0.130726	9.75807	0.129504	9.3935	0.128561	9.79342	0.119182	9.57586	0.131882	9.65164	0.132726	9.69939	0.126082	9.50692	0.131982	9.79151	0.122261	9.4727	0.133126	9.58503	0.120582	9.862	0.120582	9.52115	0.129504	9.71352	0.126461	9.45389	0.132182
Color Plot	TRUE	9.73141	0.1278			9.65696	0.123104	9.32183	0.130404	9.7807	0.126504	9.44688	0.135004	9.53451	0.130904	9.69159	0.117982	9.62814	0.124582	9.43084	0.130726	9.70476	0.129504	9.34186	0.128561	9.73973	0.119182	9.52452	0.131882	9.59949	0.132726	9.64672	0.126082	9.45402	0.131982	9.73784	0.122261	9.42018	0.133126	9.5336	0.120582	9.80755	0.120582	9.4704	0.129504	9.6607	0.126461	9.40158	0.132182
3D plot	FALSE	9.36768	0.1271			9.60534	0.12303	9.27154	0.13033	9.72773	0.12643	9.39522	0.13493	9.48418	0.13083	9.63959	0.117913	9.57682	0.124513	9.37936	0.130646	9.65262	0.12943	9.29135	0.128497	9.68721	0.119113	9.4743	0.131813	9.54848	0.132646	9.5952	0.126013	9.40229	0.131913	9.68534	0.122197	9.36882	0.133046	9.48328	0.120513	9.7543	0.120513	9.42075	0.12943	9.60903	0.126397	9.35042	0.132113
Linear	FALSE	9.76658	0.1176			9.55712	0.122884	9.22456	0.130184	9.67827	0.126284	9.34698	0.134784	9.43718	0.130684	9.59103	0.117778	9.52889	0.124378	9.33128	0.13049	9.60392	0.129284	9.24417	0.128372	9.63816	0.118978	9.4274	0.131678	9.50083	0.13249	9.54708	0.125878	9.35397	0.131778	9.63631	0.122072	9.32084	0.13289	9.43629	0.120378	9.70456	0.120378	9.37438	0.129284	9.56077	0.126272	9.30264	0.131978
Data Range	G3:J81	9.55019	0.1303			9.51442	0.122673	9.18296	0.129973	9.63446	0.126073	9.30425	0.134573	9.39556	0.130473	9.54802	0.117582	9.48645	0.124182	9.2887	0.130264	9.5608	0.129073	9.20239	0.128191	9.59473	0.118782	9.38586	0.131482	9.45864	0.132264	9.50447	0.125682	9.31118	0.131582	9.59289	0.121891	9.27836	0.132664	9.39468	0.120182	9.66052	0.120182	9.33332	0.129073	9.51804	0.126091	9.26032	0.131782
Filled Symbols	FALSE	9.62557	0.1309			9.4791	0.122407	9.14856	0.129707	9.59823	0.125807	9.26891	0.134307	9.36114	0.130207	9.51245	0.117335	9.45134	0.123935	9.25348	0.129979	9.52513	0.128807	9.16784	0.127963	9.5588	0.118535	9.35151	0.131235	9.42374	0.131979	9.46923	0.125435	9.27579	0.131335	9.55697	0.121663	9.24322	0.132379	9.36026	0.119935	9.62409	0.119935	9.29936	0.128807	9.48269	0.125863	9.22532	0.131535
ConcAge	FALSE	9.67305	0.1245			9.45271	0.122097	9.12285	0.129397	9.57116	0.125497	9.24251	0.133997	9.33541	0.129897	9.48587	0.117047	9.42511	0.123647	9.22717	0.129647	9.49847	0.128497	9.14202	0.127697	9.53195	0.118247	9.32584	0.130947	9.39767	0.131647	9.4429	0.125147	9.24934	0.131047	9.53014	0.121397	9.21697	0.132047	9.33454	0.119647	9.59686	0.119647	9.27398	0.128497	9.45628	0.125597	9.19917	0.131247
ConcSwap	FALSE	9.48047	0.1304			9.4364	0.121756	9.10696	0.129056	9.55443	0.125156	9.22619	0.133656	9.31952	0.129556	9.46944	0.116731	9.4089	0.123331	9.2109	0.129282	9.482	0.128156	9.12606	0.127405	9.51536	0.117931	9.30998	0.130631	9.38155	0.131282	9.42662	0.124831	9.233	0.130731	9.51355	0.121105	9.20074	0.131682	9.31865	0.119331	9.58004	0.119331	9.2583	0.128156	9.43996	0.125305	9.18301	0.130931
1st Symbol-row	1	9.76467	0.1208			9.43088	0.1214	9.10159	0.1287	9.54877	0.1248	9.22067	0.1333	9.31414	0.1292	9.46388	0.1164	9.40341	0.123	9.2054	0.1289	9.47643	0.1278	9.12066	0.1271	9.50975	0.1176	9.30461	0.1303	9.3761	0.1309	9.42112	0.1245	9.22747	0.1304	9.50794	0.1208	9.19525	0.1313	9.31327	0.119	9.57435	0.119	9.25299	0.1278	9.43444	0.125	9.17754	0.1306
		9.44644	0.1313			9.4364	0.121044	9.10696	0.128344	9.55443	0.124444	9.22619	0.132944	9.31952	0.128844	9.46944	0.116069	9.4089	0.122669	9.2109	0.128518	9.482	0.127444	9.12606	0.126795	9.51536	0.117269	9.30998	0.129969	9.38155	0.130518	9.42662	0.124169	9.233	0.130069	9.51355	0.120495	9.20074	0.130918	9.31865	0.118669	9.58004	0.118669	9.2583	0.127444	9.43996	0.124695	9.18301	0.130269
		9.55932	0.119			9.45271	0.120703	9.12285	0.128003	9.57116	0.124103	9.24251	0.132603	9.33541	0.128503	9.48587	0.115753	9.42511	0.122353	9.22717	0.128153	9.49847	0.127103	9.14202	0.126503	9.53195	0.116953	9.32584	0.129653	9.39767	0.130153	9.4429	0.123853	9.24934	0.129753	9.53014	0.120203	9.21697	0.130553	9.33454	0.118353	9.59686	0.118353	9.27398	0.127103	9.45628	0.124403	9.19917	0.129953
		9.83478	0.119			9.4791	0.120393	9.14856	0.127693	9.59823	0.123793	9.26891	0.132293	9.36114	0.128193	9.51245	0.115465	9.45134	0.122065	9.25348	0.127821	9.52513	0.126793	9.16784	0.126237	9.5588	0.116665	9.35151	0.129365	9.42374	0.129821	9.46923	0.123565	9.27579	0.129465	9.55697	0.119937	9.24322	0.130221	9.36026	0.118065	9.62409	0.118065	9.29936	0.126793	9.48269	0.124137	9.22532	0.129665
		9.49577	0.1278			9.51442	0.120127	9.18296	0.127427	9.63446	0.123527	9.30425	0.132027	9.39556	0.127927	9.54802	0.115218	9.48645	0.121818	9.2887	0.127536	9.5608	0.126527	9.20239	0.126009	9.59473	0.116418	9.38586	0.129118	9.45864	0.129536	9.50447	0.123318	9.31118	0.129218	9.59289	0.119709	9.27836	0.129936	9.39468	0.117818	9.66052	0.117818	9.33332	0.126527	9.51804	0.123909	9.26032	0.129418
		9.68711	0.125			9.55712	0.119916	9.22456	0.127216	9.67827	0.123316	9.34698	0.131816	9.43718	0.127716	9.59103	0.115022	9.52889	0.121622	9.33128	0.12731	9.60392	0.126316	9.24417	0.125828	9.63816	0.116222	9.4274	0.128922	9.50083	0.12931	9.54708	0.123122	9.35397	0.129022	9.63631	0.119528	9.32084	0.12971	9.43629	0.117622	9.70456	0.117622	9.37438	0.126316	9.56077	0.123728	9.30264	0.129222
		9.42774	0.1306			9.60534	0.11977	9.27154	0.12707	9.72773	0.12317	9.39522	0.13167	9.48418	0.12757	9.63959	0.114887	9.57682	0.121487	9.37936	0.127154	9.65262	0.12617	9.29135	0.125703	9.68721	0.116087	9.4743	0.128787	9.54848	0.129154	9.5952	0.122987	9.40229	0.128887	9.68534	0.119403	9.36882	0.129554	9.48328	0.117487	9.7543	0.117487	9.42075	0.12617	9.60903	0.123603	9.35042	0.129087
		9.62279	0.1259			9.65696	0.119696	9.32183	0.126996	9.7807	0.123096	9.44688	0.131596	9.53451	0.127496	9.69159	0.114818	9.62814	0.121418	9.43084	0.127074	9.70476	0.126096	9.34186	0.125639	9.73973	0.116018	9.52452	0.128718	9.59949	0.129074	9.64672	0.122918	9.45402	0.128818	9.73784	0.119339	9.42018	0.129474	9.5336	0.117418	9.80755	0.117418	9.4704	0.126096	9.6607	0.123539	9.40158	0.129018
		9.60984	0.1244			9.70974	0.119696	9.37325	0.126996	9.83484	0.123096	9.49969	0.131596	9.58595	0.127496	9.74475	0.114818	9.68061	0.121418	9.48348	0.127074	9.75807	0.126096	9.3935	0.125639	9.79342	0.116018	9.57586	0.128718	9.65164	0.129074	9.69939	0.122918	9.50692	0.128818	9.79151	0.119339	9.4727	0.129474	9.58503	0.117418	9.862	0.117418	9.52115	0.126096	9.71352	0.123539	9.45389	0.129018
		10.007	0.1103			9.76137	0.11977	9.42355	0.12707	9.8878	0.12317	9.55135	0.13167	9.63628	0.12757	9.79675	0.114887	9.73192	0.121487	9.53496	0.127154	9.81021	0.12617	9.44401	0.125703	9.84594	0.116087	9.62607	0.128787	9.70266	0.129154	9.7509	0.122987	9.55865	0.128887	9.844	0.119403	9.52406	0.129554	9.63535	0.117487	9.91525	0.117487	9.5708	0.12617	9.76518	0.123603	9.50505	0.129087
		9.83961	0.1181			9.80959	0.119916	9.47052	0.127216	9.93727	0.123316	9.59959	0.131816	9.68327	0.127716	9.84532	0.115022	9.77985	0.121622	9.58304	0.12731	9.8589	0.126316	9.49119	0.125828	9.89499	0.116222	9.67297	0.128922	9.7503	0.12931	9.79902	0.123122	9.60697	0.129022	9.89304	0.119528	9.57203	0.12971	9.68234	0.117622	9.96499	0.117622	9.61717	0.126316	9.81344	0.123728	9.55283	0.129222
		9.80392	0.1219			9.85229	0.120127	9.51212	0.127427	9.98107	0.123527	9.64232	0.132027	9.7249	0.127927	9.88833	0.115218	9.8223	0.121818	9.62562	0.127536	9.90203	0.126527	9.53297	0.126009	9.93843	0.116418	9.71451	0.129118	9.79249	0.129536	9.84163	0.123318	9.64976	0.129218	9.93646	0.119709	9.61452	0.129936	9.72395	0.117818	10.009	0.117818	9.65823	0.126527	9.85617	0.123909	9.59515	0.129418
		9.54199	0.1342			9.88761	0.120393	9.54653	0.127693	10.0173	0.123793	9.67766	0.132293	9.75932	0.128193	9.9239	0.115465	9.85741	0.122065	9.66084	0.127821	9.9377	0.126793	9.56752	0.126237	9.97436	0.116665	9.74886	0.129365	9.82739	0.129821	9.87687	0.123565	9.68515	0.129465	9.97237	0.119937	9.64966	0.130221	9.75837	0.118065	10.0455	0.118065	9.69219	0.126793	9.89152	0.124137	9.63015	0.129665
		9.76849	0.1202			9.914	0.120703	9.57223	0.128003	10.0444	0.124103	9.70406	0.132603	9.78504	0.128503	9.95048	0.115753	9.88364	0.122353	9.68715	0.128153	9.96435	0.127103	9.59334	0.126503	10.0012	0.116953	9.77453	0.129653	9.85346	0.130153	9.9032	0.123853	9.7116	0.129753	9.9992	0.120203	9.67591	0.130553	9.78409	0.118353	10.0727	0.118353	9.71757	0.127103	9.91793	0.124403	9.6563	0.129953
		9.79528	0.1162			9.93031	0.121044	9.58812	0.128344	10.0611	0.124444	9.72038	0.132944	9.80094	0.128844	9.96691	0.116069	9.89985	0.122669	9.70342	0.128518	9.98082	0.127444	9.6093	0.126795	10.0178	0.117269	9.79039	0.129969	9.86958	0.130518	9.91948	0.124169	9.72794	0.130069	10.0158	0.120495	9.69214	0.130918	9.79998	0.118669	10.0895	0.118669	9.73325	0.127444	9.93425	0.124695	9.67246	0.130269
		9.72573	0.1203			9.93582	0.1214	9.5935	0.1287	10.0668	0.1248	9.7259	0.1333	9.80632	0.1292	9.97246	0.1164	9.90533	0.123	9.70892	0.1289	9.9864	0.1278	9.6147	0.1271	10.0234	0.1176	9.79576	0.1303	9.87503	0.1309	9.92498	0.1245	9.73347	0.1304	10.0214	0.1208	9.69763	0.1313	9.80536	0.119	10.0952	0.119	9.73856	0.1278	9.93977	0.125	9.67793	0.1306
		9.49758	0.1295
		9.6432	0.1179
		9.59509	0.1245
		9.50028	0.1266
		9.51928	0.125
		9.92753	0.1129
		9.6432	0.1234
		9.65717	0.1245
		9.62371	0.119
		9.81643	0.1163
		9.58773	0.125
		9.93838	0.1152
		9.74944	0.1175
		9.3985	0.1357
		9.9108	0.1162
		9.5048	0.1254
		9.58773	0.1215
		9.5039	0.1279
		9.80296	0.1186
		9.84543	0.1189
		9.60523	0.1241
		9.70309	0.1258
		9.68242	0.1236
		9.68898	0.1206
		9.53743	0.1256
		9.63762	0.1241
		9.51022	0.1301
		9.49668	0.1324
		10.0715	0.1178
		9.67492	0.1279
		9.3932	0.1346
		9.47329	0.1314
		9.66184	0.126
		9.77517	0.122
		9.83284	0.1231
		9.68054	0.1286
		9.82511	0.1247
		9.86193	0.1155
		9.62464	0.1257
		9.83284	0.1327
		9.83284	0.1284
		9.74659	0.1224
		9.71817	0.125
		9.66184	0.1237
		9.72763	0.1287
		9.95025	0.1213
		9.71817	0.1238
		9.82318	0.1241
		IsoLine	IsoLine
[truncated: 114 more columns]

## Sheet: PlotDat4
Source sheet	Xuxa	9.68335	0.1214	2	0.175884	15.6212	0.0547005	8.3851	0.18	9.93582	0.1214	9.5935	0.1287	10.0668	0.1248	9.7259	0.1333	9.80632	0.1292	9.97246	0.1164	9.90533	0.123	9.70892	0.1289	9.9864	0.1278	9.6147	0.1271	10.0234	0.1176	9.79576	0.1303	9.87503	0.1309	9.92498	0.1245	9.73347	0.1304	10.0214	0.1208	9.69763	0.1313	9.80536	0.119	10.0952	0.119	9.73856	0.1278
Plot name	Concordia1	9.34754	0.1287	2.01291	0.174366	10.2518	0.059901	11.3633	0.05	9.9256	0.121883	9.58354	0.129183	10.0563	0.125283	9.71567	0.133783	9.79635	0.129683	9.96216	0.116848	9.89517	0.123448	9.69872	0.129417	9.97607	0.128283	9.60469	0.127514	10.013	0.118048	9.78581	0.130748	9.86493	0.131417	9.91478	0.124948	9.72322	0.130848	10.011	0.121214	9.68745	0.131817	9.79539	0.119448	10.0847	0.119448	9.72872	0.128283
Plot Type	1	9.80777	0.1248	2.08645	0.166636	7.56836	0.0657994			9.89575	0.122326	9.55445	0.129626	10.0257	0.125726	9.6858	0.134226	9.76725	0.130126	9.93209	0.11726	9.8655	0.12386	9.66895	0.129893	9.94592	0.128726	9.57549	0.127894	9.98264	0.11846	9.75678	0.13116	9.83543	0.131893	9.88499	0.12536	9.69331	0.13126	9.98064	0.121594	9.65775	0.132293	9.7663	0.11986	10.0539	0.11986	9.70002	0.128726
1st free col	169	9.47329	0.1333	2.16462	0.159303	5.95934	0.0724996			9.84869	0.122695	9.50861	0.129995	9.97738	0.126095	9.63872	0.134595	9.72138	0.130495	9.8847	0.117602	9.81872	0.124202	9.62203	0.130287	9.89839	0.129095	9.52944	0.12821	9.93477	0.118802	9.711	0.131502	9.78893	0.132287	9.83803	0.125702	9.64615	0.131602	9.93279	0.12191	9.61093	0.132687	9.72044	0.120202	10.0053	0.120202	9.65476	0.129095
Sigma Level	2	9.56023	0.1292	2.24784	0.152345	4.88752	0.0801223			9.78823	0.122959	9.44972	0.130259	9.91536	0.126359	9.57823	0.134859	9.66246	0.130759	9.82381	0.117847	9.75863	0.124447	9.56174	0.13057	9.83734	0.129359	9.4703	0.128436	9.87327	0.119047	9.6522	0.131747	9.7292	0.13257	9.77771	0.125947	9.58557	0.131847	9.87132	0.122136	9.55079	0.13297	9.66153	0.120447	9.94296	0.120447	9.59663	0.129359
Absolute Errs	TRUE	9.71817	0.1164	2.33662	0.145742	4.12267	0.088807			9.71928	0.123096	9.38255	0.130396	9.84463	0.126496	9.50924	0.134996	9.59525	0.130896	9.75436	0.117975	9.69009	0.124575	9.49299	0.130717	9.7677	0.129496	9.40284	0.128554	9.80313	0.119175	9.58513	0.131875	9.66107	0.132717	9.7089	0.126075	9.51648	0.131975	9.80121	0.122254	9.48219	0.133117	9.59433	0.120575	9.87184	0.120575	9.53033	0.129496
Symbol Type	1	9.65437	0.123	2.43154	0.139474	3.54967	0.0987156			9.64742	0.123096	9.31254	0.130396	9.77091	0.126496	9.43733	0.134996	9.52521	0.130896	9.68198	0.117975	9.61866	0.124575	9.42133	0.130717	9.69513	0.129496	9.33253	0.128554	9.73003	0.119175	9.51524	0.131875	9.59006	0.132717	9.6372	0.126075	9.44446	0.131975	9.72813	0.122254	9.41069	0.133117	9.5243	0.120575	9.79771	0.120575	9.46122	0.129496
Inverse Plot	TRUE	9.45716	0.1289	2.53324	0.133524	3.10458	0.110036			9.57847	0.122959	9.24537	0.130259	9.70018	0.126359	9.36834	0.134859	9.458	0.130759	9.61254	0.117847	9.55012	0.124447	9.35257	0.13057	9.62549	0.129359	9.26507	0.128436	9.65989	0.119047	9.44817	0.131747	9.52193	0.13257	9.56839	0.125947	9.37537	0.131847	9.65802	0.122136	9.34209	0.13297	9.45711	0.120447	9.72659	0.120447	9.39492	0.129359
Color Plot	TRUE	9.73141	0.1278	2.64247	0.127875	2.74902	0.122987			9.51802	0.122695	9.18647	0.129995	9.63816	0.126095	9.30785	0.134595	9.39907	0.130495	9.55165	0.117602	9.49003	0.124202	9.29229	0.130287	9.56443	0.129095	9.20592	0.12821	9.59839	0.118802	9.38937	0.131502	9.4622	0.132287	9.50807	0.125702	9.31479	0.131602	9.59655	0.12191	9.28195	0.132687	9.39819	0.120202	9.66423	0.120202	9.33678	0.129095
3D plot	FALSE	9.36768	0.1271	2.76008	0.12251	2.45857	0.137821			9.47096	0.122326	9.14063	0.129626	9.58988	0.125726	9.26077	0.134226	9.3532	0.130126	9.50425	0.11726	9.44325	0.12386	9.24537	0.129893	9.51691	0.128726	9.15988	0.127894	9.55052	0.11846	9.3436	0.13116	9.4157	0.131893	9.46111	0.12536	9.26763	0.13126	9.5487	0.121594	9.23513	0.132293	9.35233	0.11986	9.61569	0.11986	9.29153	0.128726
Linear	FALSE	9.76658	0.1176	2.88709	0.117415	2.21696	0.154833			9.44111	0.121883	9.11155	0.129183	9.55926	0.125283	9.2309	0.133783	9.32411	0.129683	9.47418	0.116848	9.41358	0.123448	9.2156	0.129417	9.48676	0.128283	9.13067	0.127514	9.52015	0.118048	9.31456	0.130748	9.3862	0.131417	9.43132	0.124948	9.23772	0.130848	9.51834	0.121214	9.20542	0.131817	9.32324	0.119448	9.5849	0.119448	9.26282	0.128283
Data Range	G3:J81	9.55019	0.1303	3.02463	0.112574	2.01291	0.174366			9.43088	0.1214	9.10159	0.1287	9.54877	0.1248	9.22067	0.1333	9.31414	0.1292	9.46388	0.1164	9.40341	0.123	9.2054	0.1289	9.47643	0.1278	9.12066	0.1271	9.50975	0.1176	9.30461	0.1303	9.3761	0.1309	9.42112	0.1245	9.22747	0.1304	9.50794	0.1208	9.19525	0.1313	9.31327	0.119	9.57435	0.119	9.25299	0.1278
Filled Symbols	FALSE	9.62557	0.1309	3.17408	0.107975	IsoLine	IsoLine			9.44111	0.120917	9.11155	0.128217	9.55926	0.124317	9.2309	0.132817	9.32411	0.128717	9.47418	0.115952	9.41358	0.122552	9.2156	0.128383	9.48676	0.127317	9.13067	0.126686	9.52015	0.117152	9.31456	0.129852	9.3862	0.130383	9.43132	0.124052	9.23772	0.129952	9.51834	0.120386	9.20542	0.130783	9.32324	0.118552	9.5849	0.118552	9.26282	0.127317
ConcAge	FALSE	9.67305	0.1245	3.33704	0.103603					9.47096	0.120474	9.14063	0.127774	9.58988	0.123874	9.26077	0.132374	9.3532	0.128274	9.50425	0.11554	9.44325	0.12214	9.24537	0.127907	9.51691	0.126874	9.15988	0.126306	9.55052	0.11674	9.3436	0.12944	9.4157	0.129907	9.46111	0.12364	9.26763	0.12954	9.5487	0.120006	9.23513	0.130307	9.35233	0.11814	9.61569	0.11814	9.29153	0.126874
ConcSwap	FALSE	9.48047	0.1304	3.51541	0.0994487					9.51802	0.120105	9.18647	0.127405	9.63816	0.123505	9.30785	0.132005	9.39907	0.127905	9.55165	0.115198	9.49003	0.121798	9.29229	0.127513	9.56443	0.126505	9.20592	0.12599	9.59839	0.116398	9.38937	0.129098	9.4622	0.129513	9.50807	0.123298	9.31479	0.129198	9.59655	0.11969	9.28195	0.129913	9.39819	0.117798	9.66423	0.117798	9.33678	0.126505
1st Symbol-row	1	9.76467	0.1208	3.71148	0.0954988					9.57847	0.119841	9.24537	0.127141	9.70018	0.123241	9.36834	0.131741	9.458	0.127641	9.61254	0.114953	9.55012	0.121553	9.35257	0.12723	9.62549	0.126241	9.26507	0.125764	9.65989	0.116153	9.44817	0.128853	9.52193	0.12923	9.56839	0.123053	9.37537	0.128953	9.65802	0.119464	9.34209	0.12963	9.45711	0.117553	9.72659	0.117553	9.39492	0.126241
		9.44644	0.1313	3.92799	0.0917429					9.64742	0.119704	9.31254	0.127004	9.77091	0.123104	9.43733	0.131604	9.52521	0.127504	9.68198	0.114825	9.61866	0.121425	9.42133	0.127083	9.69513	0.126104	9.33253	0.125646	9.73003	0.116025	9.51524	0.128725	9.59006	0.129083	9.6372	0.122925	9.44446	0.128825	9.72813	0.119346	9.41069	0.129483	9.5243	0.117425	9.79771	0.117425	9.46122	0.126104
		9.55932	0.119	4.1683	0.0881707					9.71928	0.119704	9.38255	0.127004	9.84463	0.123104	9.50924	0.131604	9.59525	0.127504	9.75436	0.114825	9.69009	0.121425	9.49299	0.127083	9.7677	0.126104	9.40284	0.125646	9.80313	0.116025	9.58513	0.128725	9.66107	0.129083	9.7089	0.122925	9.51648	0.128825	9.80121	0.119346	9.48219	0.129483	9.59433	0.117425	9.87184	0.117425	9.53033	0.126104
		9.83478	0.119	4.43656	0.0847727					9.78823	0.119841	9.44972	0.127141	9.91536	0.123241	9.57823	0.131741	9.66246	0.127641	9.82381	0.114953	9.75863	0.121553	9.56174	0.12723	9.83734	0.126241	9.4703	0.125764	9.87327	0.116153	9.6522	0.128853	9.7292	0.12923	9.77771	0.123053	9.58557	0.128953	9.87132	0.119464	9.55079	0.12963	9.66153	0.117553	9.94296	0.117553	9.59663	0.126241
		9.49577	0.1278	4.7379	0.0815397					9.84869	0.120105	9.50861	0.127405	9.97738	0.123505	9.63872	0.132005	9.72138	0.127905	9.8847	0.115198	9.81872	0.121798	9.62203	0.127513	9.89839	0.126505	9.52944	0.12599	9.93477	0.116398	9.711	0.129098	9.78893	0.129513	9.83803	0.123298	9.64615	0.129198	9.93279	0.11969	9.61093	0.129913	9.72044	0.117798	10.0053	0.117798	9.65476	0.126505
		9.68711	0.125	5.07884	0.078463					9.89575	0.120474	9.55445	0.127774	10.0257	0.123874	9.6858	0.132374	9.76725	0.128274	9.93209	0.11554	9.8655	0.12214	9.66895	0.127907	9.94592	0.126874	9.57549	0.126306	9.98264	0.11674	9.75678	0.12944	9.83543	0.129907	9.88499	0.12364	9.69331	0.12954	9.98064	0.120006	9.65775	0.130307	9.7663	0.11814	10.0539	0.11814	9.70002	0.126874
		9.42774	0.1306	5.46768	0.0755345					9.9256	0.120917	9.58354	0.128217	10.0563	0.124317	9.71567	0.132817	9.79635	0.128717	9.96216	0.115952	9.89517	0.122552	9.69872	0.128383	9.97607	0.127317	9.60469	0.126686	10.013	0.117152	9.78581	0.129852	9.86493	0.130383	9.91478	0.124052	9.72322	0.129952	10.011	0.120386	9.68745	0.130783	9.79539	0.118552	10.0847	0.118552	9.72872	0.127317
		9.62279	0.1259	5.91527	0.0727464					9.93582	0.1214	9.5935	0.1287	10.0668	0.1248	9.7259	0.1333	9.80632	0.1292	9.97246	0.1164	9.90533	0.123	9.70892	0.1289	9.9864	0.1278	9.6147	0.1271	10.0234	0.1176	9.79576	0.1303	9.87503	0.1309	9.92498	0.1245	9.73347	0.1304	10.0214	0.1208	9.69763	0.1313	9.80536	0.119	10.0952	0.119	9.73856	0.1278
		9.60984	0.1244	6.43596	0.0700915
		10.007	0.1103	7.0492	0.0675628
		9.83961	0.1181	7.78202	0.0651539
		9.80392	0.1219	8.67311	0.0628585
		9.54199	0.1342	9.77987	0.0606709
		9.76849	0.1202	11.1913	0.0585854
		9.79528	0.1162	13.053	0.0565969
		9.72573	0.1203	15.6212	0.0547005
		9.49758	0.1295	16	0.0545187
		9.6432	0.1179	IsoLine	IsoLine
		9.59509	0.1245
		9.50028	0.1266
		9.51928	0.125
		9.92753	0.1129
		9.6432	0.1234
		9.65717	0.1245
		9.62371	0.119
		9.81643	0.1163
		9.58773	0.125
		9.93838	0.1152
		9.74944	0.1175
		9.3985	0.1357
		9.9108	0.1162
		9.5048	0.1254
		9.58773	0.1215
		9.5039	0.1279
		9.80296	0.1186
		9.84543	0.1189
		9.60523	0.1241
		9.70309	0.1258
		9.68242	0.1236
		9.68898	0.1206
		9.53743	0.1256
		9.63762	0.1241
		9.51022	0.1301
		9.49668	0.1324
		10.0715	0.1178
		9.67492	0.1279
		9.3932	0.1346
		9.47329	0.1314
		9.66184	0.126
		9.77517	0.122
		9.83284	0.1231
		9.68054	0.1286
		9.82511	0.1247
		9.86193	0.1155
		9.62464	0.1257
		9.83284	0.1327
		9.83284	0.1284
		9.74659	0.1224
		9.71817	0.125
		9.66184	0.1237
		9.72763	0.1287
		9.95025	0.1213
		9.71817	0.1238
		9.82318	0.1241
		IsoLine	IsoLine
[truncated: 120 more columns]

## Sheet: Xuxa
Apatite secondary standard	Ratios (corrected for Standard common-Pb)										Final Ages (Ma)
Id	207Pb/235U	±2σ	206Pb/238U	±2σ	Rho	238U/206Pb	±2σ	207Pb/206Pb	±2σ	Rho	207Pb/235U	±2σ	206Pb/238U	±2σ	Concordance (%)
XUXA	1.733	0.04	0.10327	0.0022	0.13704	9.68335	0.206288	0.1214	0.0014	0.42288	1021	15	633.5	13	62.047
XUXA	1.898	0.044	0.10698	0.0023	0.21598	9.34754	0.200966	0.1287	0.0014	0.37221	1079.6	15	655.1	13	60.6799
XUXA	1.753	0.041	0.10196	0.0022	0.20731	9.80777	0.211623	0.1248	0.0014	0.36647	1027.2	15	625.9	13	60.9326
XUXA	1.939	0.045	0.10556	0.0023	0.28093	9.47329	0.206409	0.1333	0.0014	0.29531	1093.7	15	646.9	13	59.1478
XUXA	1.863	0.043	0.1046	0.0022	0.17758	9.56023	0.201076	0.1292	0.0014	0.37453	1067.2	15	641.3	13	60.0918
XUXA	1.649	0.038	0.1029	0.0022	0.0679	9.71817	0.207774	0.1164	0.0013	0.40888	988.1	15	631.3	13	63.8903
XUXA	1.755	0.041	0.10358	0.0022	0.20069	9.65437	0.205055	0.123	0.0013	0.28434	1027.9	15	635.3	13	61.8056
XUXA	1.876	0.043	0.10574	0.0023	0.18413	9.45716	0.205707	0.1289	0.0015	0.3253	1072.4	16	647.9	13	60.4159
XUXA	1.806	0.042	0.10276	0.0022	0.24926	9.73141	0.208341	0.1278	0.0014	0.33793	1046.6	15	630.5	13	60.2427
XUXA	1.871	0.042	0.10675	0.0023	0.15787	9.36768	0.201833	0.1271	0.0012	0.37839	1070	15	653.8	13	61.1028
XUXA	1.659	0.039	0.10239	0.0022	0.33403	9.76658	0.209849	0.1176	0.0013	0.21506	991.9	15	628.3	13	63.3431
XUXA	1.882	0.043	0.10471	0.0022	0.19492	9.55019	0.200653	0.1303	0.0013	0.38777	1073.7	15	641.9	13	59.7839
XUXA	1.876	0.044	0.10389	0.0022	0.13222	9.62557	0.203833	0.1309	0.0015	0.32542	1071.2	15	637.1	13	59.4754
XUXA	1.774	0.041	0.10338	0.0022	0.16787	9.67305	0.205849	0.1245	0.0013	0.39101	1034.9	15	634.1	13	61.2716
XUXA	1.894	0.043	0.10548	0.0023	0.17836	9.48047	0.206722	0.1304	0.0013	0.35153	1078.8	15	646.4	13	59.9184
XUXA	1.706	0.039	0.10241	0.0022	0.2405	9.76467	0.209767	0.1208	0.0012	0.27993	1009.7	15	628.5	13	62.2462
XUXA	1.91	0.045	0.10586	0.0023	0.3167	9.44644	0.205241	0.1313	0.0015	0.22114	1083.6	16	648.6	13	59.856
XUXA	1.716	0.04	0.10461	0.0022	0.27696	9.55932	0.201037	0.119	0.0013	0.26551	1013.5	15	641.3	13	63.2758
XUXA	1.671	0.039	0.10168	0.0022	0.20967	9.83478	0.21279	0.119	0.0013	0.29475	998	14	624.2	13	62.5451
XUXA	1.856	0.043	0.10531	0.0022	0.21952	9.49577	0.198373	0.1278	0.0014	0.33628	1064.4	15	645.4	13	60.6351
XUXA	1.777	0.04	0.10323	0.0022	0.19261	9.68711	0.206448	0.125	0.0012	0.3342	1036.2	15	633.3	13	61.1175
XUXA	1.91	0.043	0.10607	0.0023	0.13361	9.42774	0.204429	0.1306	0.0013	0.40638	1083.6	15	649.8	13	59.9668
XUXA	1.805	0.041	0.10392	0.0022	0.13177	9.62279	0.203716	0.1259	0.0013	0.36365	1046.2	15	637.3	13	60.9157
XUXA	1.783	0.041	0.10406	0.0022	0.26988	9.60984	0.203168	0.1244	0.0013	0.30377	1038.4	15	638.1	13	61.4503
XUXA	1.524	0.036	0.09993	0.0021	0.18513	10.007	0.210294	0.1103	0.0013	0.3618	939.1	14	614	12	65.3817
XUXA	1.656	0.038	0.10163	0.0022	0.20957	9.83961	0.213	0.1181	0.0012	0.29974	990.9	15	623.9	13	62.963
XUXA	1.714	0.039	0.102	0.0022	0.20101	9.80392	0.211457	0.1219	0.0012	0.29798	1013	15	626.1	13	61.8065
XUXA	1.94	0.043	0.1048	0.0022	0.23066	9.54199	0.200309	0.1342	0.0011	0.31243	1094.1	15	642.4	13	58.7149
XUXA	1.693	0.039	0.10237	0.0022	0.27381	9.76849	0.209931	0.1202	0.0012	0.23129	1005.6	14	628.2	13	62.4702
XUXA	1.634	0.038	0.10209	0.0022	0.29165	9.79528	0.211085	0.1162	0.0013	0.2374	982.3	15	626.6	13	63.7891
XUXA	1.703	0.039	0.10282	0.0022	0.088257	9.72573	0.208098	0.1203	0.0013	0.4115	1008.6	14	630.9	13	62.5521
XUXA	1.88	0.043	0.10529	0.0022	0.23774	9.49758	0.198449	0.1295	0.0013	0.26149	1072.8	15	645.3	13	60.151
XUXA	1.682	0.038	0.1037	0.0022	0.2954	9.6432	0.204581	0.1179	0.0011	0.28668	1000.7	15	636	13	63.5555
XUXA	1.786	0.04	0.10422	0.0022	0.15972	9.59509	0.202544	0.1245	0.0013	0.34633	1040.1	15	639	13	61.4364
XUXA	1.837	0.042	0.10526	0.0022	0.17736	9.50028	0.198562	0.1266	0.0013	0.31286	1057.7	15	645.1	13	60.9908
XUXA	1.808	0.041	0.10505	0.0022	0.16266	9.51928	0.199357	0.125	0.0013	0.32795	1048.2	15	643.9	13	61.4291
XUXA	1.565	0.039	0.10073	0.0023	0.25418	9.92753	0.226678	0.1129	0.0015	0.34774	954.9	16	618.6	14	64.7817
XUXA	1.762	0.045	0.1037	0.0024	0.23263	9.6432	0.223179	0.1234	0.0017	0.26965	1029.8	17	636	14	61.7596
XUXA	1.782	0.045	0.10355	0.0024	0.24107	9.65717	0.223826	0.1245	0.0015	0.31089	1037.6	16	635.1	14	61.2086
XUXA	1.701	0.042	0.10391	0.0024	0.21375	9.62371	0.222278	0.119	0.0015	0.3351	1008.4	16	637.2	14	63.1892
XUXA	1.628	0.041	0.10187	0.0023	0.14468	9.81643	0.221633	0.1163	0.0016	0.37832	980.7	16	625.3	14	63.7606
XUXA	1.797	0.046	0.1043	0.0024	0.36051	9.58773	0.220619	0.125	0.0016	0.20481	1042.7	17	639.5	14	61.3312
XUXA	1.595	0.041	0.10062	0.0023	0.12961	9.93838	0.227174	0.1152	0.0017	0.37139	967.9	16	618	13	63.8496
XUXA	1.659	0.044	0.10257	0.0023	0.083254	9.74944	0.218619	0.1175	0.0019	0.35399	993.2	16	629.4	14	63.3709
XUXA	1.991	0.052	0.1064	0.0024	0.32099	9.3985	0.211996	0.1357	0.0018	0.16655	1110.5	17	651.7	14	58.6853
XUXA	1.614	0.04	0.1009	0.0023	0.12745	9.9108	0.225915	0.1162	0.0016	0.3962	974.1	16	619.6	13	63.6074
XUXA	1.816	0.046	0.10521	0.0024	0.15379	9.5048	0.216819	0.1254	0.0017	0.3825	1049.9	16	644.8	14	61.4154
XUXA	1.741	0.044	0.1043	0.0024	0.088318	9.58773	0.220619	0.1215	0.0017	0.44469	1023.2	16	639.5	14	62.5
XUXA	1.854	0.045	0.10522	0.0024	0.27923	9.5039	0.216778	0.1279	0.0015	0.29344	1063.6	16	644.9	14	60.6337
XUXA	1.668	0.042	0.10201	0.0023	0.15196	9.80296	0.221026	0.1186	0.0015	0.38045	995.2	16	626.1	14	62.912
XUXA	1.665	0.043	0.10157	0.0023	0.10099	9.84543	0.222945	0.1189	0.0019	0.39898	993.4	16	623.5	14	62.7642
XUXA	1.779	0.045	0.10411	0.0024	0.00013169	9.60523	0.221425	0.1241	0.0019	0.50803	1036.2	17	638.4	14	61.6097
XUXA	1.783	0.046	0.10306	0.0024	0.25934	9.70309	0.22596	0.1258	0.0018	0.28533	1038.5	17	632.3	14	60.8859
XUXA	1.754	0.044	0.10328	0.0023	0.13971	9.68242	0.215623	0.1236	0.0016	0.35546	1028.1	16	633.5	14	61.6185
XUXA	1.713	0.044	0.10321	0.0024	0.12541	9.68898	0.225303	0.1206	0.0017	0.41345	1011.8	16	633.1	14	62.5717
XUXA	1.812	0.046	0.10485	0.0024	0.15838	9.53743	0.21831	0.1256	0.0018	0.29153	1048	17	642.7	14	61.3263
XUXA	1.775	0.045	0.10376	0.0024	0.1392	9.63762	0.222921	0.1241	0.0017	0.40301	1034.6	16	636.3	14	61.502
XUXA	1.885	0.049	0.10515	0.0024	0.19799	9.51022	0.217066	0.1301	0.0019	0.31877	1074.1	17	644.5	14	60.0037
XUXA	1.922	0.035	0.1053	0.0016	0.12013	9.49668	0.144299	0.1324	0.0016	0.40716	1088.1	12	645.4	9.4	59.3144
XUXA	1.613	0.031	0.09929	0.0015	0.22633	10.0715	0.152153	0.1178	0.0016	0.25805	973.4	12	610.2	8.9	62.6875
XUXA	1.82	0.034	0.10336	0.0016	0.13318	9.67492	0.149767	0.1279	0.0017	0.40572	1051.8	12	634	9.3	60.2776
XUXA	1.975	0.036	0.10646	0.0016	0.11901	9.3932	0.141172	0.1346	0.0016	0.26983	1105.5	12	652.1	9.5	58.9869
XUXA	1.91	0.036	0.10556	0.0016	0.16538	9.47329	0.143589	0.1314	0.0017	0.37462	1083	12	646.9	9.5	59.7322
XUXA	1.784	0.059	0.1035	0.0028	0.095369	9.66184	0.261383	0.126	0.0032	0.4192	1036	22	634.6	16	61.2548
XUXA	1.72	0.056	0.1023	0.0027	0.22156	9.77517	0.257996	0.122	0.0027	0.3097	1011	21	627.5	16	62.0673
XUXA	1.721	0.058	0.1017	0.0027	0.11939	9.83284	0.261049	0.1231	0.003	0.33482	1010	22	624.2	16	61.802
XUXA	1.828	0.055	0.1033	0.0027	0.15384	9.68054	0.253025	0.1286	0.0025	0.37463	1054	20	633.8	16	60.1328
XUXA	1.743	0.057	0.10178	0.0026	0.15214	9.82511	0.250985	0.1247	0.0028	0.33689	1019	21	624.7	15	61.3052
XUXA	1.609	0.052	0.1014	0.0027	0.0099061	9.86193	0.262596	0.1155	0.0028	0.47191	972	20	622.3	16	64.0226
XUXA	1.796	0.06	0.1039	0.0028	0.093029	9.62464	0.259374	0.1257	0.0031	0.39648	1040	22	636.9	16	61.2404
XUXA	1.856	0.059	0.1017	0.0027	0.11512	9.83284	0.261049	0.1327	0.0029	0.38292	1060	21	624.7	16	58.934
XUXA	1.796	0.059	0.1017	0.0027	0.17612	9.83284	0.261049	0.1284	0.003	0.33843	1038	21	624.2	16	60.1349
XUXA	1.722	0.057	0.1026	0.0028	0.13092	9.74659	0.265989	0.1224	0.003	0.38165	1011	21	629.6	16	62.275
XUXA	1.76	0.058	0.1029	0.0027	0.13348	9.71817	0.254996	0.125	0.003	0.34684	1025	21	631.1	16	61.5707
XUXA	1.765	0.057	0.1035	0.0028	0.17172	9.66184	0.261383	0.1237	0.0028	0.35846	1028	21	634.5	16	61.7218
XUXA	1.812	0.06	0.1028	0.0027	0.058154	9.72763	0.255492	0.1287	0.0032	0.41336	1046	21	630.4	16	60.2677
XUXA	1.675	0.054	0.1005	0.0026	0.15733	9.95025	0.257419	0.1213	0.0027	0.33644	994	21	617.5	15	62.1227
XUXA	1.749	0.059	0.1029	0.0027	0.057429	9.71817	0.254996	0.1238	0.0032	0.40989	1020	22	631.2	16	61.8824
XUXA	1.733	0.057	0.1018	0.0027	0.14726	9.82318	0.260536	0.1241	0.003	0.33362	1017	21	624.8	16	61.4356

[truncated: 5 more sheets: Zircon trace elements standards, BB9, Plešovice (2), 91500 (2), GJ-1 (2)]
